# Supplementary material for: Intercepting a transient non-hemic pyridine N-oxide Fe(iii) species involved in OAT reactions
Source: Royal Society of Chemistry journal article supplement (doi:10.1039/d1cc04521k), 2021-01-01
Supplement: d1cc04521k1.pdf [file d1cc04521k1.pdf]

## Electronic Supporting Information

### **Intercepting a Transient Non-Hemic Pyridine N-Oxide Fe(III) Species**

Nhat Tam Vo, Christian Herrero, Régis Guillot, Tanya Inceoglu, Winfried Leibl, Martin Clémancey, Patrick Dubourdeaux, Geneviève Blondin, Ally Aukauloo\* and Marie Sircoglou\*

|                                             |    |
|---------------------------------------------|----|
| I. Materials and Instrumentation.....       | 2  |
| II. Experimental procedures.....            | 2  |
| III. Crystal structure determination .....  | 4  |
| IV. Catalysis .....                         | 6  |
| V. UV-visible Absorption spectroscopy ..... | 8  |
| VI. EPR spectroscopy .....                  | 9  |
| VII. Mössbauer spectroscopy .....           | 10 |
| VIII. Mass spectrometry .....               | 11 |
| IX. Infra-Red spectroscopy .....            | 12 |
| X. Reactivity with NaClO .....              | 13 |
| XI. DFT Calculations.....                   | 16 |

## I. Materials and Instrumentation

Iron(III) chloride hexahydrate (98%) and iodosalicylic acid diacetate (98 %) were purchased from Sigma-Aldrich. Sodium hypochlorite solution (5 %) was purchased from Acros Organics. Water-<sup>18</sup>O (97%) was purchased from Euriso-Top. The <sup>57</sup>Fe-enriched metal (95.55%) was obtained from Chemgas (SAS JLD Instruments).

UV-visible absorption spectra were recorded on a Varian Cary 60 UV-vis spectrophotometer using 1 cm quartz cuvettes.

X-band EPR spectra were recorded on a Bruker ELEXSYS 500 spectrometer equipped with a Bruker ER 4116DM X-band resonator, an Oxford Instrument continuous flow ESR 900 cryostat, and an Oxford ITC 503 temperature control system. Sample of typically 1 mM of complexes and intermediates were prepared in acetonitrile added with 0.1 M TBAPF<sub>6</sub> then transferred to a degassed EPR tube and frozen to 77 K before their analysis.

Electrospray ionization mass spectrometry experiments were recorded on a Thermo Scientific DSQ 2004 model under either positive or negative modes. Samples were prepared as a 100–200 μM solution in acetonitrile and were directly injected into the spectrometer. For the detection of intermediate species, the samples were frozen in liquid nitrogen following their preparation and melt to room temperature just prior to injection in the spectrometer.

The high-performance gas chromatography experiments (HPGC) were performed on a GC-2010 system from Shimadzu with a Zebron ZB Semi-Volatiles column (25 m, 0.25 mm, 0.25 mm). The Shimadzu GC software was used to perform and analyze chromatograms.

Mössbauer spectra were recorded at 4.2 and 5.8 K, either on a low field Mössbauer spectrometer equipped with a Janis SVT-400 cryostat or on a strong-field Mössbauer spectrometer equipped with an Oxford Instruments Spectromag 4000 cryostat containing an 8 T split-pair superconducting magnet. Both spectrometers were operated in a constant acceleration mode in transmission geometry. The isomer shifts are referenced against that of a room-temperature metallic iron foil. Analysis of the data was performed with a home-made program.

Infra-red spectra were recorded on an attenuated total reflectance-infrared (ATR-IR) Thermo-Nicole

t 6700 FTIR spectrometer, equipped with a mercury-cadmium-telluride (MCT) detector. 5 μL of the sample solution (1 mM) was deposited onto the diamond prism of the ATR-IR and the solvent was evaporated under a stream of nitrogen gas until a dry film was formed. For each spectrum, 200 sample scans were recorded with a resolution of 4 cm<sup>-1</sup>, a speed of 1.8988 kHz and an aperture of 10 mm from 4000 cm<sup>-1</sup> to 500 cm<sup>-1</sup>.

X-ray diffraction data were collected using a VENTURE PHOTON100 CMOS Bruker diffractometer with Micro-focus IuS source Mo K $\alpha$  radiation for crystal grown in ACN/Et<sub>2</sub>O and Cu K $\alpha$  radiation for crystal grown in acetone. Crystals were mounted on a CryoLoop (Hampton Research) with Paratone-N (Hampton Research) as cryoprotectant and then flash-frozen in a nitrogen-gas stream at 100 K. The temperature of the crystal was maintained at the selected temperature by means of an N-Helix cooling device to within an accuracy of  $\pm 1$ K. The data were corrected for Lorentz polarization and absorption effects. The structures were solved by direct methods using SHELXS-97<sup>1</sup> and refined against F<sup>2</sup> by full-matrix least-squares techniques using SHELXL-2018<sup>2</sup> with anisotropic displacement parameters for all non-hydrogen atoms. Hydrogen atoms were located on a difference Fourier map and introduced into the calculations as a riding model with isotropic thermal parameters. All calculations were performed by using the Crystal Structure crystallographic software package WINGX.<sup>3</sup>

## II. Experimental procedures

The **DPPyH** ligand was synthesized in 3 steps by optimizing a previously reported<sup>4</sup> procedure.

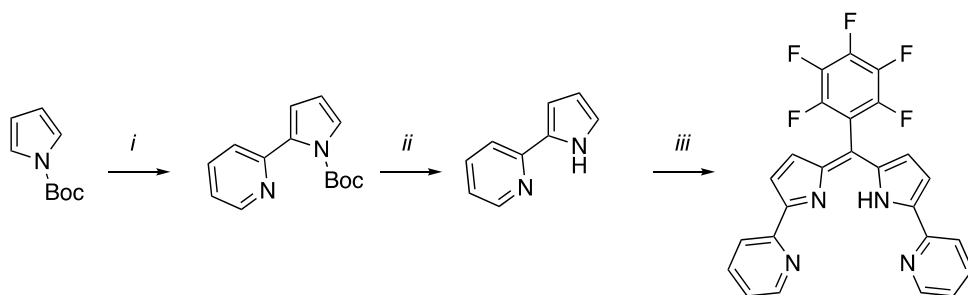

i) 2-bromopyridine (2.26 mL, 23.60 mmol, 1 equiv.) was dissolved in a 2:1:1 mixture of dioxane, ethanol and water (200 mL). This solution was degassed under argon for 1h.  $[\text{Pd}(\text{PPh}_3)_4]$  (2.73 g, 2.36 mmol, 0.1 equiv.) and (N- Boc-2-pyrrolyl)boronic acid (5.00 g, 23.6 mmol, 1 equiv.) were then added. The mixture was stirred for 20 min.  $\text{K}_2\text{CO}_3$  (10.00 g, 0.24 mol, 10 equiv.) was added, and the reactional mixture was stirred vigorously at 107 °C for 2 h. After cooling to room temperature, solvents were evaporated. The obtained solid was dissolved in 200 mL of ethyl acetate then washed with 200 mL of aq.  $\text{K}_2\text{CO}_3$  1M (3 times). The organic phase was dried over  $\text{Na}_2\text{SO}_4$  then filtered and concentrated. The residue was purified by column chromatography on silica gel (petroleum ether/ethyl acetate, 9:1) to yield 2-(N-Boc-1H-pyrrol-2-yl)pyridine as a yellow oil (3.9 g, 68%).  $^1\text{H}$  NMR ( $\text{CDCl}_3$ , 250 MHz):  $\delta$  = 1.36 (s, 9 H,  $\text{CH}_3$ ), 6.25 (t,  $J$  = 3.3 Hz, 1 H), 6.42 (dd,  $J$  = 3.3, 1.8 Hz, 1 H), 7.20 (ddd,  $J$  = 12, 4.8, 1.2 Hz, 1 H), 7.36–7.43 (m, 2 H), 7.68 (td,  $J$  = 7.5, 1.8 Hz, 1 H), 8.60–8.64 (m, 1 H) ppm.

ii) 2-(N-Boc-1H-pyrrol-2-yl)pyridine (3.9 g, 16.05 mmol) was dissolved in  $\text{CH}_2\text{Cl}_2$  (30 mL) and aq. HCl 3 M (30 mL) was added. The biphasic mixture was vigorously stirred at room temperature for 60 h. The solution was neutralized by addition of a sat. aq.  $\text{NaHCO}_3$  solution and extracted with 100 mL of water (3 times). The organic phase was dried over  $\text{Na}_2\text{SO}_4$  and filtered. The solution was concentrated to yield 2-(2-Pyrrolyl)pyridine as a white solid (2.28 g, 95 %).  $^1\text{H}$  NMR ( $\text{CDCl}_3$ , 360 MHz):  $\delta$  = 6.30 (dt,  $J$  = 2.6, 3.6 Hz, 1 H), 6.7 (m, 1 H), 6.9 (m, 2 H), 7.03 (dd,  $J$  = 2.0, 5.5 Hz, 1 H), 7.54 (d,  $J$  = 7.7 Hz, 2 H), 7.62 (td,  $J$  = 7.7, 1.6 Hz, 1 H), 8.45 (d,  $J$  = 5 Hz, 1 H), 9.8 (br. s, NH) ppm.

iii) *p*-toluenesulfonic acid (4.5 g, 23.7 mmol, 3 equiv.) was dissolved in toluene (50 mL). The Dean stark method was used to eliminate water in the solution. 2-(2-Pyrrolyl)pyridine (2.28 g, 15.8 mmol, 2 equiv.), pentafluorobenzaldehyde ( 1.55 g, 7.9 mmol, 1 equiv.) and 1,1,2,2- tetrachloroethane (50 mL) were then added. The mixture was heated at 138 °C under argon for 7 day, after which it was basified with aq.  $\text{K}_2\text{CO}_3$  (1 M). The aqueous phase was extracted with chloroform, and the combined organic phases were concentrated and dissolved in dichloromethane (100 mL). A solution of 2,3-dichloro-5,6-dicyano-1,4-benzoquinone (10.5 g, 47.4 mmol, 6 equiv.) in tetrahydrofuran (80 mL) was then added dropwise. The reactional mixture was stirred overnight at room temperature. The solvents were evaporated. The obtained solid was dissolved in 200 mL chloroform, then extracted 3 times with 200 mL  $\text{K}_2\text{CO}_3$  1 M. The organic phase was dried with  $\text{Na}_2\text{SO}_4$  and filtered then concentrated. Precipitation in methanol (30 mL) at -20 °C followed by filtration and drying allowed the isolation of the DPPyH ligand (2 g, 54 %) as a brown solid . $^1\text{H}$  NMR ( $\text{CDCl}_3$ , 250 MHz):  $\delta$  = 6.59 (d,  $J$  = 4.4 Hz, 2 H,  $\text{H}_{\text{pyrrol}}$ ), 7.10 (d,  $J$  = 4.4 Hz, 2 H,  $\text{H}_{\text{pyrrol}}$ ), 7.29 (m, 2 H), 7.82 (dd,  $J$  = 7.8, 1.6 Hz, 2 H), 8.20 (d,  $J$  = 8.1 Hz, 2 H), 8.72 (d,  $J$  = 4.7 Hz, 2 H), 13.70 (br. s, 1 H, NH) ppm.

**[FeDPPyCl<sub>2</sub>]:** A solution of DPPy ligand (100 mg, 215  $\mu\text{mol}$ , 1 equiv.) in methanol (20 mL) was added dropwise to a solution of  $\text{FeCl}_3 \cdot 6\text{H}_2\text{O}$  (58,3 mg, 215  $\mu\text{mol}$ , 1 equiv.) in methanol (10 mL) at room temperature, followed by addition of diethyl ether (50 mL) in order to precipitate the solid. The brown residue was filtered and dried under vacuum to give complex  $[\text{FeDPPyCl}_2]$  (116 mg, 197  $\mu\text{mol}$ , 91%). Single crystals were obtained by slowly diffusing diethyl ether to a saturated solution of complex  $[\text{FeDPPyCl}_2]$  in acetonitrile. ESI<sup>+</sup>-HRMS: calcd. For  $[\text{C}_{25}\text{H}_{12}\text{ClF}_5\text{FeN}_4]^+$  554.0015; found 553.9995. UV-vis ( $\text{CH}_3\text{CN}$ ): 668 nm ( $\epsilon$  = 10 000  $\text{M}^{-1}\text{cm}^{-1}$ ) , 589 nm ( $\epsilon$  = 21 600  $\text{M}^{-1}\text{cm}^{-1}$ ), 320 nm ( $\epsilon$  = 27 200  $\text{M}^{-1}\text{cm}^{-1}$ ), 298 nm ( $\epsilon$  = 27 700  $\text{M}^{-1}\text{cm}^{-1}$ ).

**Iodosylbenzene<sup>5</sup> (PhIO):** 30 mL of 3 M sodium hydroxide was added over a 5 min period into iodosylbenzene diacetate (5 g, 15.5 mmol) placed in a 50 mL flask with vigorous stirring. The reaction mixture was stirred for

an additional 45 minutes to complete the reaction. The solid was filtered and washed 3 times with 100 mL water then with 50 mL chloroform (3 times). The obtained solid was dried under vacuum to yield 2.9 g PhIO (85 %).

$^{57}\text{FeCl}_3$ : The  $^{57}\text{Fe}$ -enriched  $\text{FeCl}_3$  was synthesized according to the literature.<sup>6</sup>  $^{57}\text{Fe}$ -enriched iron powder (100 mg) was suspended in ethanol (30 mL) and HCl was bubbled through the reaction mixture for 3 hours. The solvent was then removed by rotary evaporation and placed under high vacuum for 12 h.

$^{57}[\text{FeDPPyCl}_2]$ : The  $^{57}\text{Fe}$ -enriched complex was prepared by metalation with the  $^{57}\text{Fe}$ -enriched  $\text{FeCl}_3$  using the procedure described above.

**Stoichiometric oxidation of  $[\text{FeDPPyCl}_2]$  by PhIO:** Solid PhIO (10eq., 1.1 mg) was added to a solution of the  $[\text{Fe}(\text{DPPy})\text{Cl}_2]$  complex (10 mL, 50  $\mu\text{M}$ ) at room temperature. The reaction mixture was sonicated for 10 s, then the insoluble PhIO was filtered off using a syringe filter. Alternatively, a freshly prepared solution of PhIO in MeOH (1 eq., 3  $\mu\text{L}$ , 50 mM) was added to the solution of the  $[\text{FeDPPyCl}_2]$  complex (3 mL, 50  $\mu\text{M}$ ). A slightly less conversion was observed in that case (see Fig S6). For labelling experiment, the 1st procedure was performed on a 1mL volume scale, followed by the addition of 20  $\mu\text{L}$  of  $^{18}\text{O}$ -labeled water.

### III. Crystal structure determination

CCDC 1966063-1966064 contains the supplementary crystallographic data for this paper. These data can be obtained free of charge from the Cambridge Crystallographic Data Centre via <http://www.ccdc.cam.ac.uk/Community/Requestastructure>.

3 Structures were obtained by X-ray analysis of single crystals grown from  $\text{Et}_2\text{O}/\text{ACN}$  at rt (A), acetone at 30°C (B,C). Their main features are summed up below, and crystallographic details are given in what follows. According to a CCDC search, we found that the average Fe(III)-N bond length in Fe(III) porphyrin complexes is 2.02 Å. While, the average length for Fe(III)-pyridine bonds is 2.15 Å with only 10% of reported structures showing bond distances over 2.23 Å.

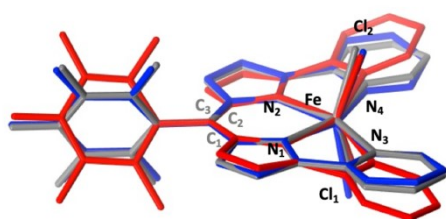

| Structure                             | A       | B               | C       |
|---------------------------------------|---------|-----------------|---------|
| Fe-N <sub>1</sub> / Fe-N <sub>2</sub> | 2.048 Å | 2.047 / 2.073 Å | 2.076 Å |
| Fe-N <sub>3</sub> / Fe-N <sub>4</sub> | 2.238 Å | 2.238 / 2.207 Å | 2.240 Å |
| N <sub>1</sub> FeN <sub>2</sub>       | 82.5°   | 81.5°           | 81.2°   |
| N <sub>3</sub> FeN <sub>4</sub>       | 127.1°  | 127.7°          | 131.4°  |
| Cl <sub>1</sub> FeCl <sub>2</sub>     | 152.0°  | 151.1°          | 147.3°  |

Figure S1: Left : Overlay along  $\text{N}_1\text{-C}_1\text{-C}_2\text{-C}_3\text{-N}_2$  fragment of the FeDPPy in A, B, C (right, H and  $\text{C}_6\text{F}_5$  omitted); Right : Selected parameters showing 1<sup>st</sup> coordination sphere distortions along the 3 forms.

- a. Structure obtained from crystals grown in  $\text{ACN}/\text{Et}_2\text{O}$  (A)

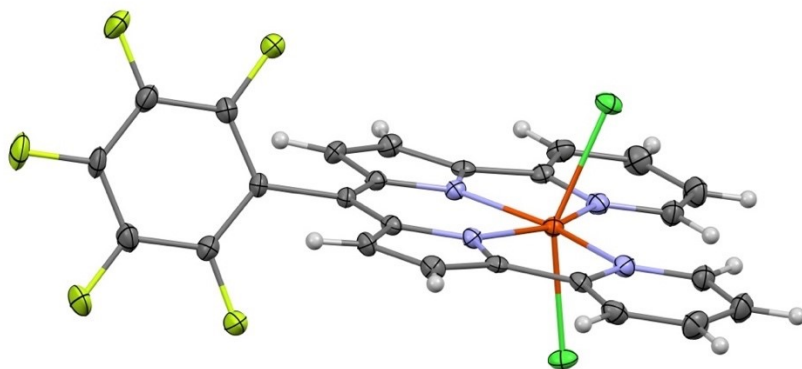

Figure S2: ORTEP representation at 30% of probability of X-Ray structure of  $[FeDPPyCl_2]$  complex.

The presence of solvent molecules could easily be seen by residual peaks located in closed spherical cavities (Figure S3).

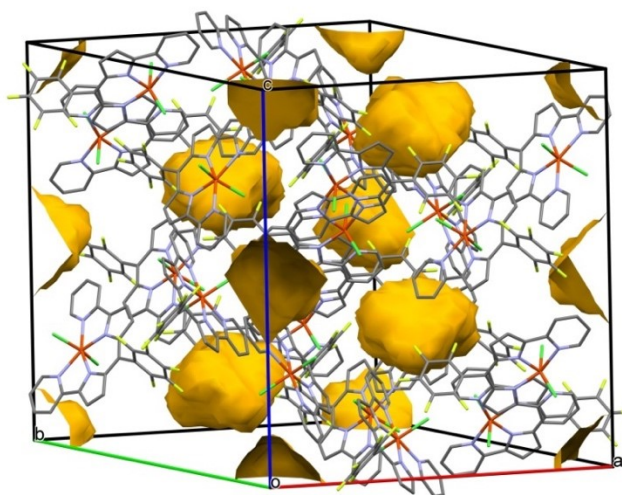

Figure S3: Crystal packing displaying space occupied by solvent molecules.

Unfortunately, they were disordered so badly that it could not be modeled even with restraints. Consequently, SQUEEZE<sup>3</sup> (from PLATON) was used to calculate the void space, the electron count and to get a new HKL file. According to the SQUEEZE results and the different experimental evidence, a total number 14  $CH_3CN$  solvent molecules (308 electrons) were considered per unit cell. Without solvent molecules:  $R_1 = 0.0848$  for 3835 reflections of  $I > 2\sigma(I)$  and  $wR_2 = 0.2502$  for all data. With solvent molecules (SQUEEZE):  $R_1 = 0.0784$  for 3835 reflections of  $I > 2\sigma(I)$  and  $wR_2 = 0.1902$  for all data, the volume fraction was calculated to  $1203 \text{ \AA}^3$  which corresponds to 11% of the unit cell volume, and to 305 electrons per unit cell allocated to solvent molecules. The crystal data collection and refinement parameters are given in Table S1.

- b. Structures obtained from crystals grown in acetone at  $30^\circ\text{C}$  (B and C)

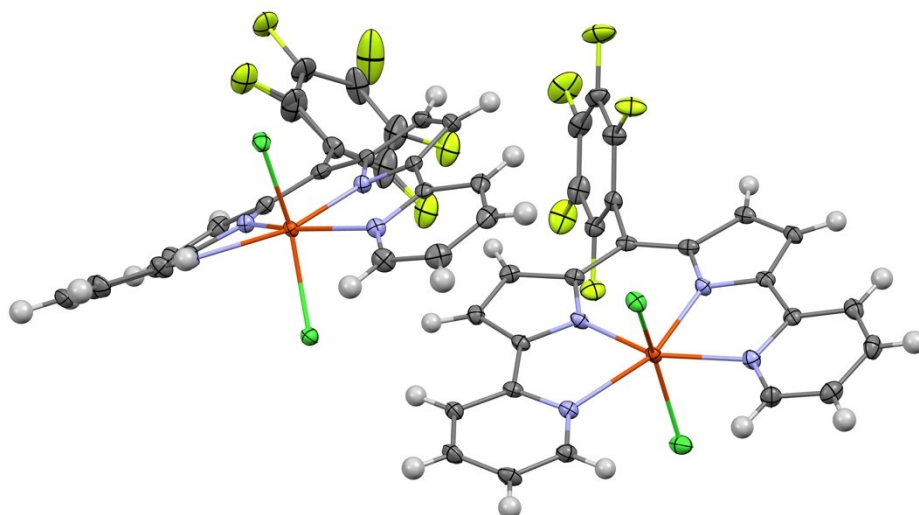

*Figure S4: ORTEP representation at 30 % of probability of X-Ray structure of the two crystallographically independent molecules of [FeDPPyCl<sub>2</sub>] complex.*

In the crystal of the [FeDPPyCl<sub>2</sub>] complex, the asymmetric unit is composed of one and a half molecules. One of [FeDPPyCl<sub>2</sub>] complexes is situated on two-fold symmetry axes. The crystal data collection and refinement parameters are given in Table S2.

Table S1: Crystallographic data and structure refinement details from crystals grown in ACN/Et<sub>2</sub>O.

| Compound                                          | [FeDPPyCl <sub>2</sub> ] (A)                                                                                               |
|---------------------------------------------------|----------------------------------------------------------------------------------------------------------------------------|
| Empirical Formula                                 | C <sub>25</sub> H <sub>12</sub> Cl <sub>2</sub> F <sub>5</sub> Fe N <sub>4</sub> [+ 7/9 (C <sub>2</sub> H <sub>3</sub> N)] |
| M <sub>r</sub>                                    | 590.14                                                                                                                     |
| Crystal size, mm <sup>3</sup>                     | 0.08 x 0.08 x 0.04                                                                                                         |
| Crystal system                                    | trigonal                                                                                                                   |
| Space group                                       | R -3 c                                                                                                                     |
| a, Å                                              | 22.4084(16)                                                                                                                |
| b, Å                                              | 22.4084(16)                                                                                                                |
| c, Å                                              | 25.9110(19)                                                                                                                |
| α, °                                              | 90                                                                                                                         |
| β, °                                              | 90                                                                                                                         |
| γ, °                                              | 120                                                                                                                        |
| Cell volume, Å <sup>3</sup>                       | 11267.7(18)                                                                                                                |
| Z ; Z'                                            | 18; 1/2                                                                                                                    |
| T, K                                              | 100 (1)                                                                                                                    |
| Radiation type ; wavelength Å                     | MoKα; 0.71073                                                                                                              |
| F <sub>000</sub>                                  | 5310                                                                                                                       |
| μ, mm <sup>-1</sup>                               | 0.868                                                                                                                      |
| θ range, °                                        | 2.623–30.530                                                                                                               |
| Reflection collected                              | 100 553                                                                                                                    |
| Reflections unique                                | 3 835                                                                                                                      |
| R <sub>int</sub>                                  | 0.1980                                                                                                                     |
| GOF                                               | 1.023                                                                                                                      |
| Refl. Obs. (I>2σ(I))                              | 2 070                                                                                                                      |
| Parameters                                        | 170                                                                                                                        |
| wR <sub>2</sub> (all data)                        | 0.1902                                                                                                                     |
| R value (I>2σ(I))                                 | 0.0784                                                                                                                     |
| Largest diff. peak and hole (e-·Å <sup>-3</sup> ) | 0.901; -0.511                                                                                                              |

Table S2: Crystallographic data and structure refinement details from crystals grown in acetone at 30°C.

| Compound                                          | [FeDPPyCl <sub>2</sub> ] (B,C)                                                   |
|---------------------------------------------------|----------------------------------------------------------------------------------|
| Empirical Formula                                 | C <sub>25</sub> H <sub>12</sub> Cl <sub>2</sub> F <sub>5</sub> Fe N <sub>4</sub> |
| M <sub>r</sub>                                    | 590.14                                                                           |
| Crystal size, mm <sup>3</sup>                     | 0.26 x 0.10 x 0.05                                                               |
| Crystal system                                    | monoclinic                                                                       |
| Space group                                       | C 2/c                                                                            |
| a, Å                                              | 19.907(3)                                                                        |
| b, Å                                              | 13.511(2)                                                                        |
| c, Å                                              | 26.718(5)                                                                        |
| α, °                                              | 90                                                                               |
| β, °                                              | 104.497(8)                                                                       |
| γ, °                                              | 90                                                                               |
| Cell volume, Å <sup>3</sup>                       | 6957(2)                                                                          |
| Z ; Z'                                            | 12 ; 3/2                                                                         |
| T, K                                              | 100 (1)                                                                          |
| Radiation type ; wavelength Å                     | CuKα; 1.54178                                                                    |
| F <sub>000</sub>                                  | 3540                                                                             |
| μ, mm <sup>-1</sup>                               | 7.755                                                                            |
| θ range, °                                        | 3.417 - 66.749                                                                   |
| Reflection collected                              | 52 122                                                                           |
| Reflections unique                                | 6 155                                                                            |
| R <sub>int</sub>                                  | 0.0422                                                                           |
| GOF                                               | 1.021                                                                            |
| Refl. Obs. (I>2σ(I))                              | 5 818                                                                            |
| Parameters                                        | 512                                                                              |
| wR <sub>2</sub> (all data)                        | 0.0864                                                                           |
| R value (I>2σ(I))                                 | 0.0330                                                                           |
| Largest diff. peak and hole (e-·Å <sup>-3</sup> ) | 1.407 ; -0.593                                                                   |

#### IV. Catalysis

Catalytic experiments were carried out in a glass vial (3 mL) containing 1 mL of acetonitrile, 1 mM of [FeDPPyCl<sub>2</sub>] (1 eq.) and 800 mM of substrate. The reaction was started by adding 20 eq. of PhIO to the solution. After stirring for the desired reaction time at room temperature, 3 μL of internal standard solution (2 mM final) were added to the reaction mixture. The resulting solution was filtered through a short silica gel column. 1.5 mL MeOH were used to collect all remaining organic products. The obtained solution was injected into HPGC to detect and quantify the oxidized products. Conversions were determined by GC against internal standards and calculated relatively to the PhIO as a limiting reagent.

Table S3: Catalytic oxidation activity of [FeDPPyCl<sub>2</sub>]. [FeDPPyCl<sub>2</sub>]/PhIO/Substrate 1:20:800 eq.

| Substrate                | Reaction Time | Products           | Conversion rel. to PhIO | TON <sub>max</sub> |
|--------------------------|---------------|--------------------|-------------------------|--------------------|
| PPh <sub>3</sub>         | <1min         | O=PPh <sub>3</sub> | 100 %                   | 20                 |
| SPhMe                    | 2h            | O=SPhMe            | 95 %                    | 19                 |
| cyclooctene              | 2/24h         | cyclooctene oxide  | 30 / 46 %               | 9.2                |
| cyclohexene <sup>‡</sup> | 2h            | cyclohexene oxide  | 12 %                    | 3.2                |
|                          |               | cyclohexenol       | 4 %                     |                    |
| toluene                  | 2h/24h        | benzyl alcohol     | 51 % / 93 %             | 20                 |
|                          |               | benzaldehyde       | 1 % / 7 %               |                    |
| diphenylmethane          | 24h           | diphenylmethanol   | 15 %                    | 6.2                |
|                          |               | benzophenone       | 8 %                     |                    |
| cyclohexane              | 24h           | cyclohexanol       | 3 %                     | 1.4                |
|                          |               | cyclohexanone      | 2 %                     |                    |

<sup>‡</sup> the solvent was degassed prior experiment



## V. UV-visible Absorption spectroscopy

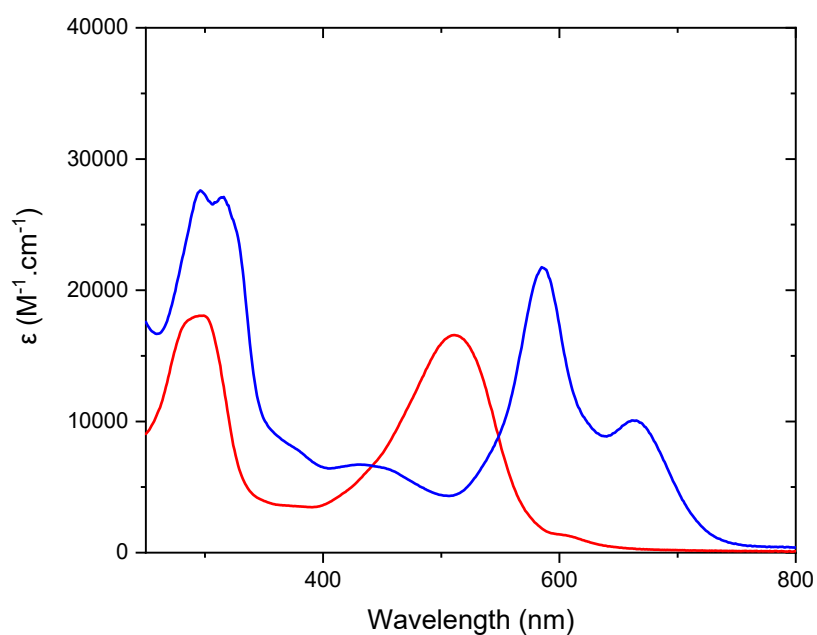

Figure S5: UV-visible spectra of DPPy ligand (red) and  $[FeDPPyCl_2]$  (blue) in acetonitrile.

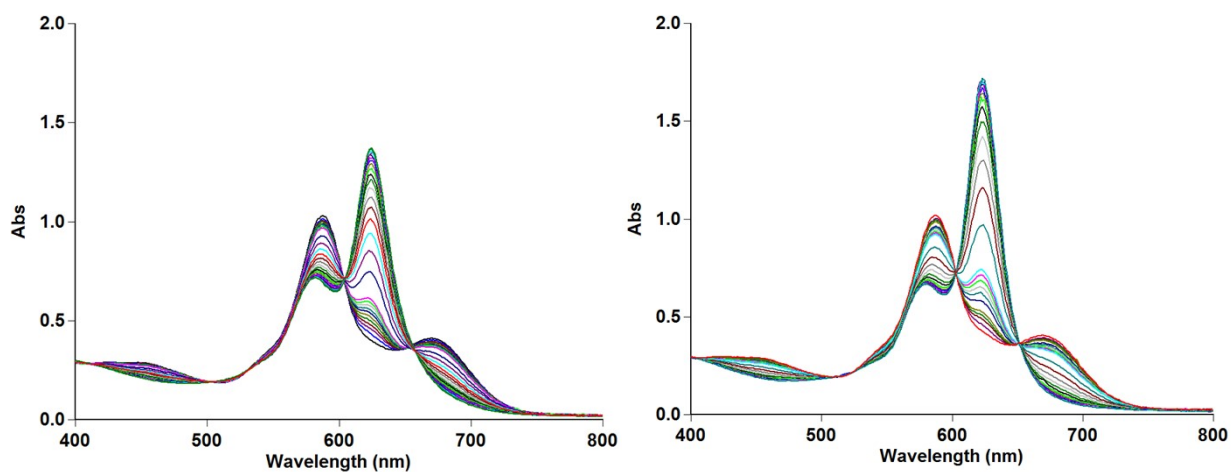

Figure S6: UV-visible spectral changes observed with a  $[FeDPPyCl_2]$  solution in ACN upon addition of ca. 1 eq (left) or 2 eq (right) of PhIO in MeOH at  $-40^\circ C$ . 10 spectra /min between  $t=0$  and 1min, then 1 spectrum /min until maximum is reached.

The previous experiments were performed to assess the number of PhIO equivalent needed to generate the detected active species. The small conversion increase observed from addition of 1 to 2 eq of PhIO is probably due to an overestimation of the concentration of the prepared PhIO solution, this reagent being known to be very difficult to purify. We can thus assume that one equivalent of PhIO only is needed to generate the active species.

## VI. EPR spectroscopy

The experimental spectrum of [FeDPPyCl<sub>2</sub>] could be fitted with a 1:1 mixture of two high spin ( $S = 5/2$ ) iron(III) species probably corresponding to two different geometries. The first set is characterized by three signals at  $g = 5.1, 3.7$  and  $2.0$  ( $E/D=0.27$ ) while the second one is characterized by three signals at  $g = 9.1, 4.2$  and  $3$  ( $E/D=0.18$ ).

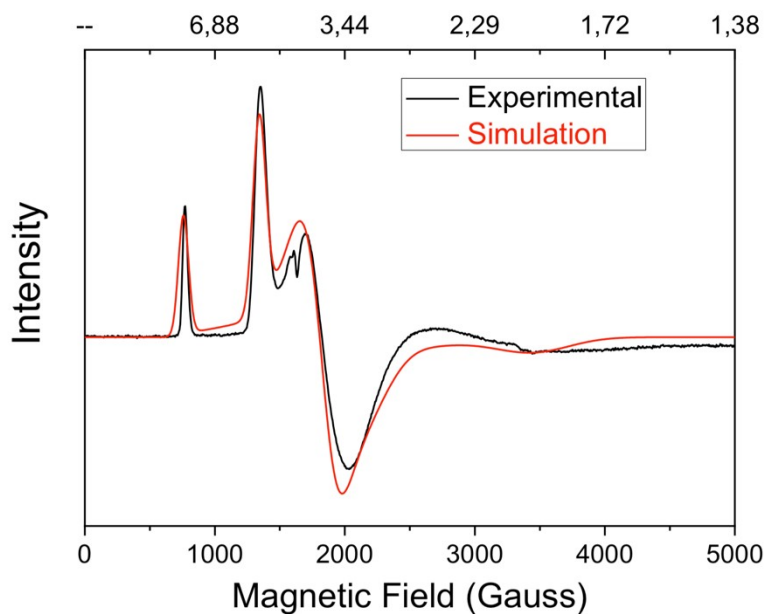

Figure S7: EPR spectrum of [FeDPPyCl<sub>2</sub>] (1 mM) in acetonitrile in presence of TBAPF<sub>6</sub> (0.1 mM) (cavity signal subtracted) and its simulation. Experimental conditions: Microwave power 0.250 mW, microwave freq. 9.63 GHz, modulation amplitude 8 Gauss, gain 44 dB, temperature 10 K.

The experimental spectrum of the oxidized complex could be fitted with a high spin ( $S = 5/2$ ) iron(III) species with  $g = 4.28$  ( $E/D=0.33$ ).

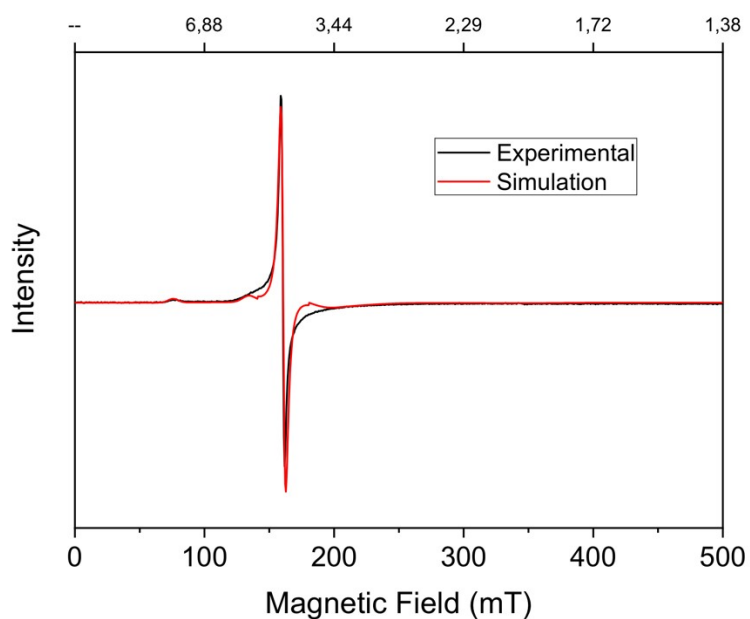

Figure S8: EPR spectrum of [FeDPPyCl<sub>2</sub>] (1 mM) in acetonitrile in presence of TBAPF<sub>6</sub> (0.1 mM) at 10 K after oxidation by PhIO and its simulation (red); Microwave power 0.250 mW, microwave freq. 9.63 GHz, modulation amplitude 8 Gauss, gain 44 dB, temperature 10 K.

## VII. Mössbauer spectroscopy

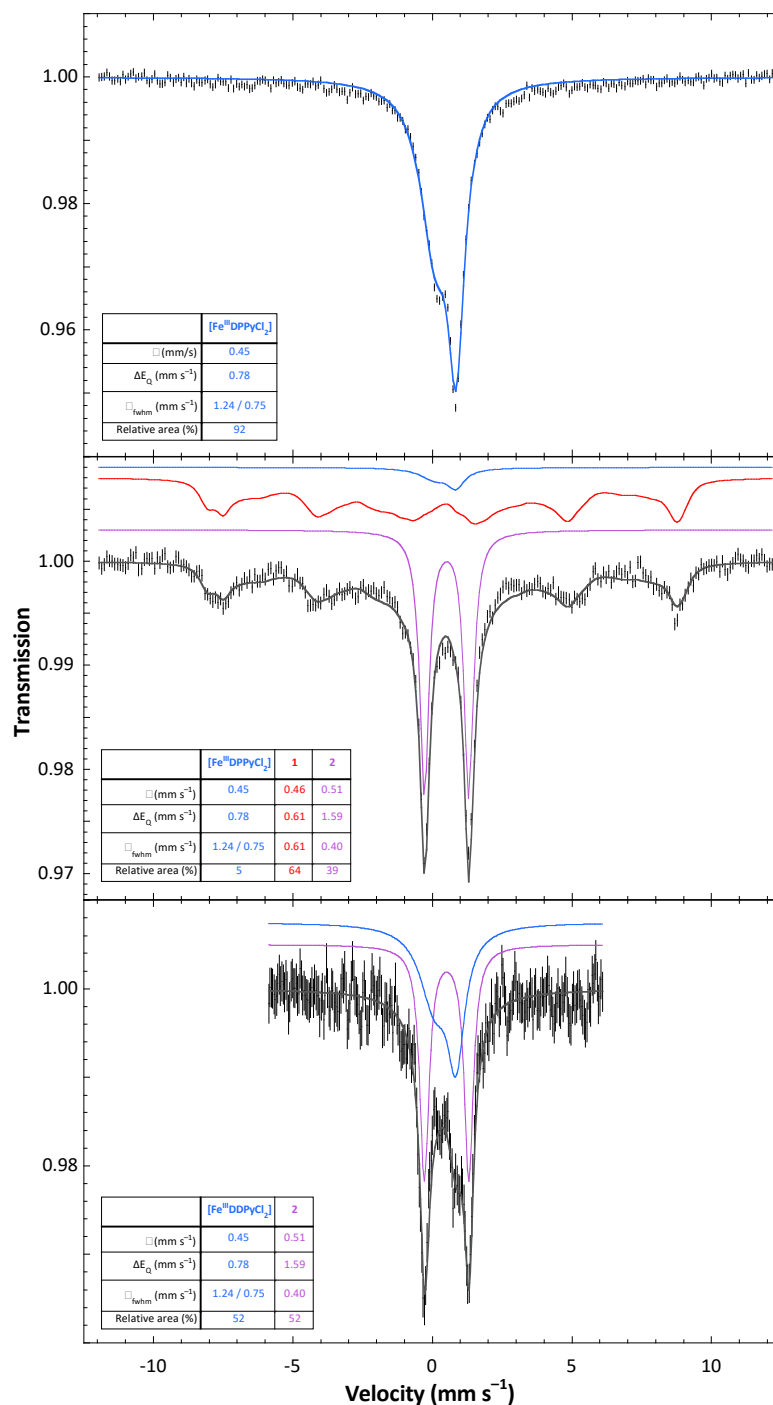

Figure S9: Experimental Mössbauer spectra (hatched bars) recorded at 4.2 (bottom) and 5.8 K (top and middle) using a 0.06 T external magnetic field applied parallel to the  $\gamma$ -beam. Spectra were recorded on frozen solutions of  $[^{57}FeDPPyCl_2]$  in acetonitrile (2 mM) (top), 10 min after oxidation by PhIO (middle), and after additional 2 h at room temperature (bottom). A simultaneous monitoring of the reaction was performed by UV-visible in order to take samples corresponding to the green and red spectra reproduced on the left part of Figure 2. Simulations are overlaid on experimental spectra as thick solid lines and deconvolutions are displayed above. The starting species (in blue) is well-described by a doublet with two different linewidths.<sup>7</sup> Species 2 (in mauve) was simulated by a doublet whereas species 1 (in red) was simulated assuming a  $S=5/2$  spin state. Species 1 is tentatively assigned to the transient species I.

## VIII. Mass spectrometry

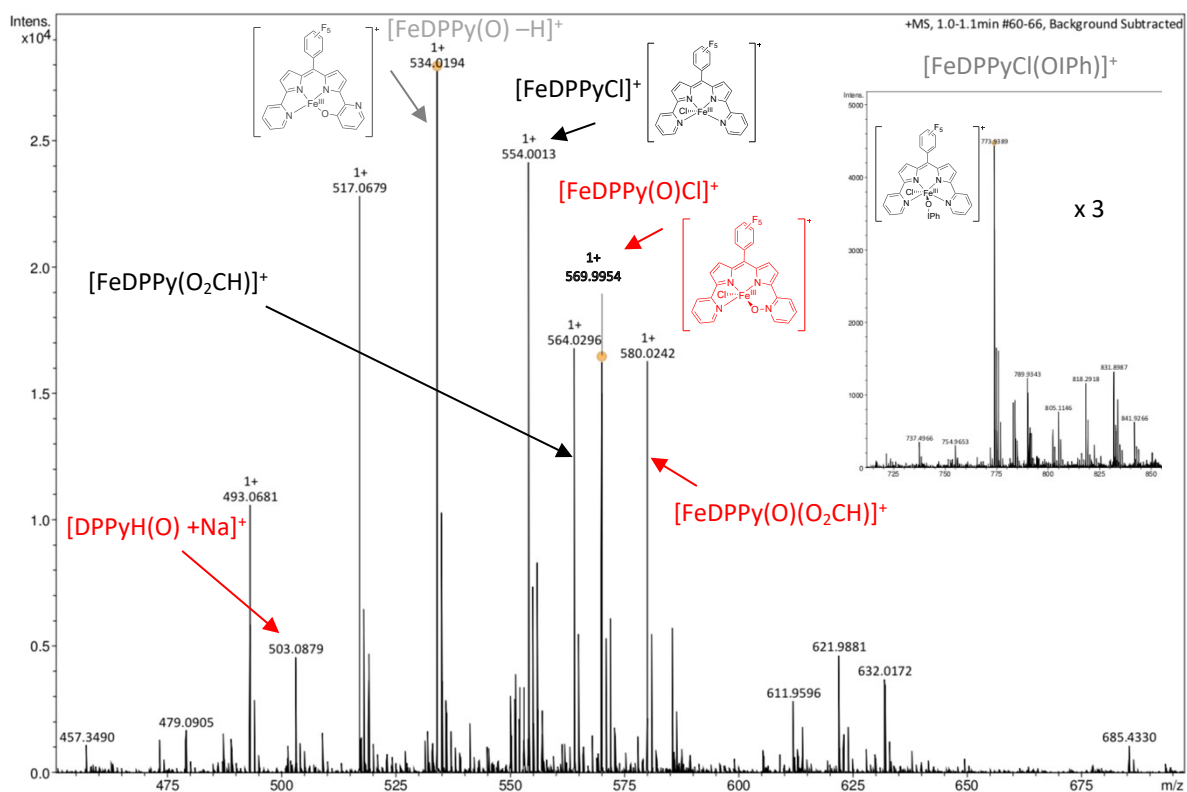

Figure S10: ESI<sup>+</sup>-HRMS analyses and possible assignment of the oxidation products obtained from the reaction of [FeDPPyCl<sub>2</sub>] with PhIO in acetonitrile. Formiate adducts result from anion exchange with the calibrant, sodium formiate.

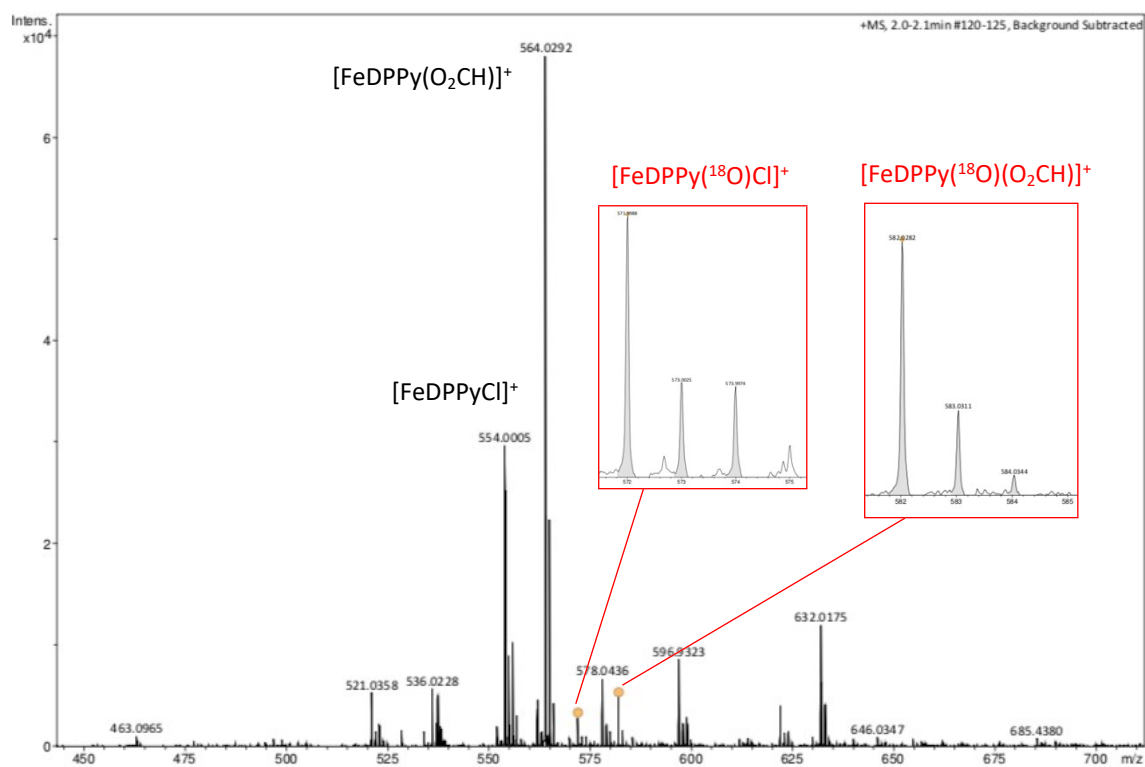

Figure S11: ESI<sup>+</sup>-HRMS analyses showing isotopic shifts upon addition of H<sub>2</sub><sup>18</sup>O to the previous sample

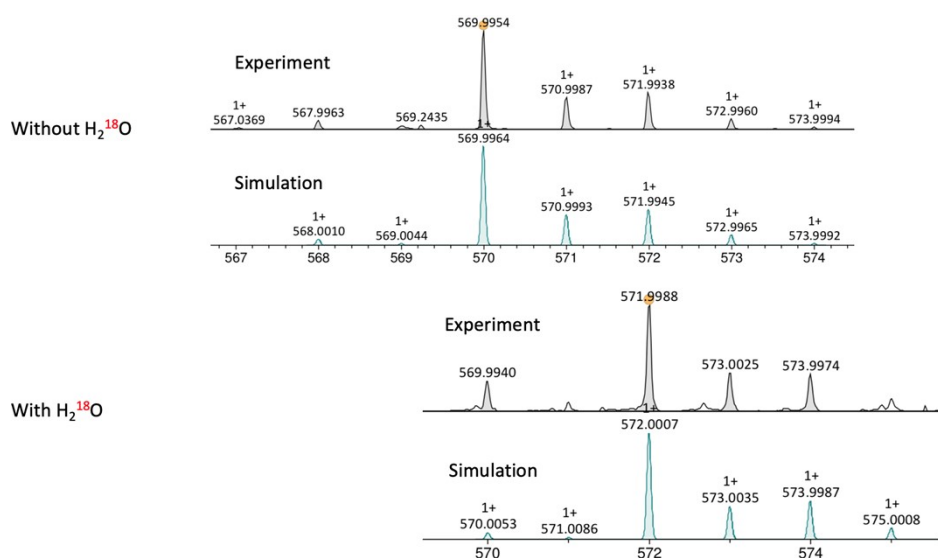

Figure S12: Zoom on the isotopic peak distribution corresponding to  $[\text{FeDPPy}(\text{O})\text{Cl}]^+$  in the absence and presence of  $\text{H}_2^{18}\text{O}$ .

## IX. Infra-Red spectroscopy

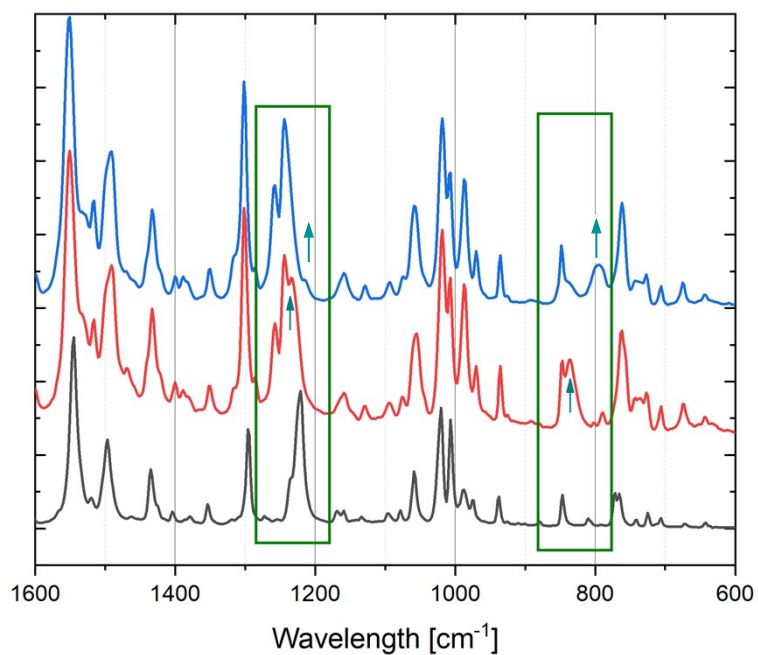

Figure S13: Infrared spectra of a solution of  $[\text{FeDPPyCl}_2]$  before (black), after addition of PhIO (red), followed by addition of  $\text{H}_2^{18}\text{O}$  (blue).

## X. Reactivity with NaClO

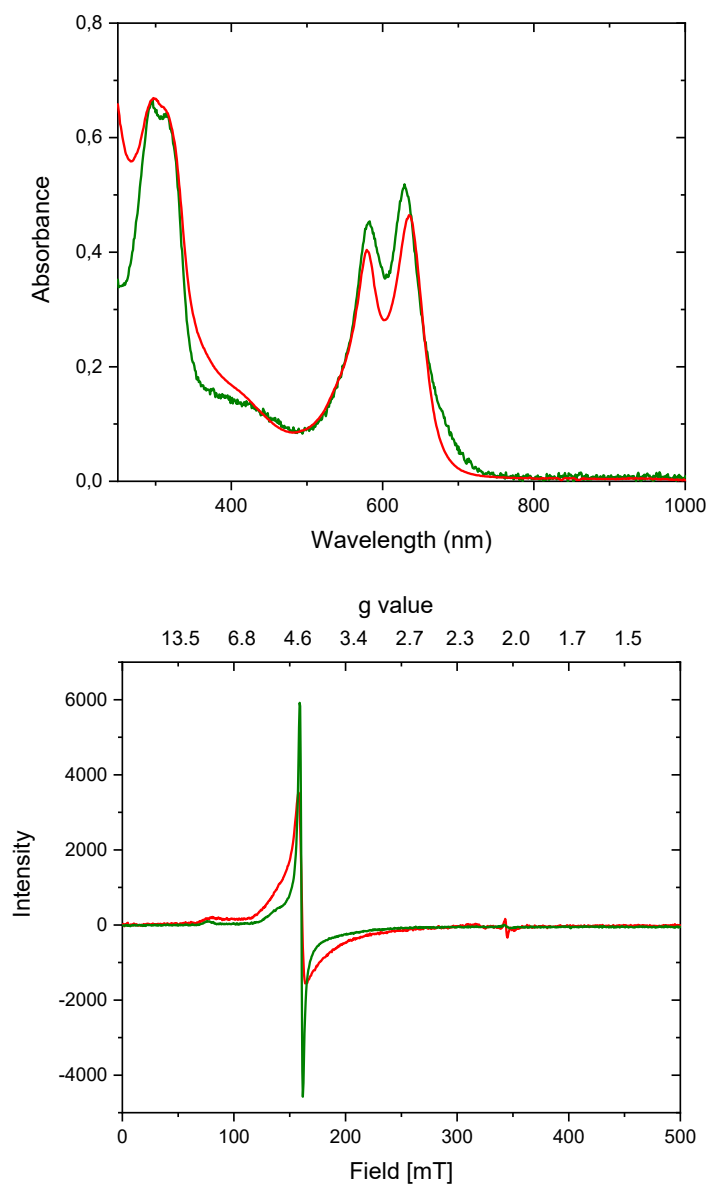

Figure S14: Comparison of the spectroscopic features of the species formed upon oxidation of  $[\text{FeDPPyCl}_2]$  by PhIO (red) and NaClO (green) monitored by UV-vis (top) and EPR (bottom) spectroscopies.

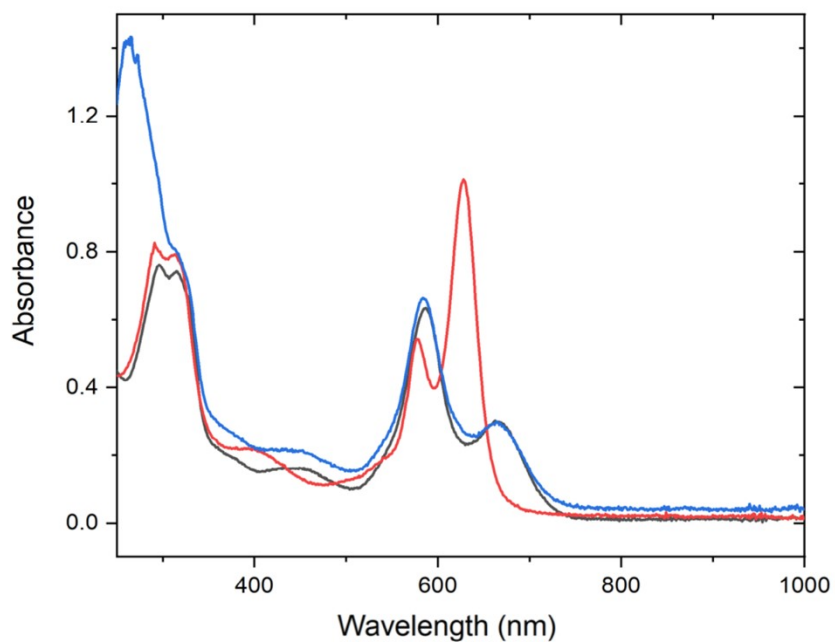

Figure S15: UV-vis spectra of a [FeDPPyCl<sub>2</sub>] solution in ACN, before (blue) and after oxidation by NaClO (red) followed by its reaction with PPh<sub>3</sub> (black).

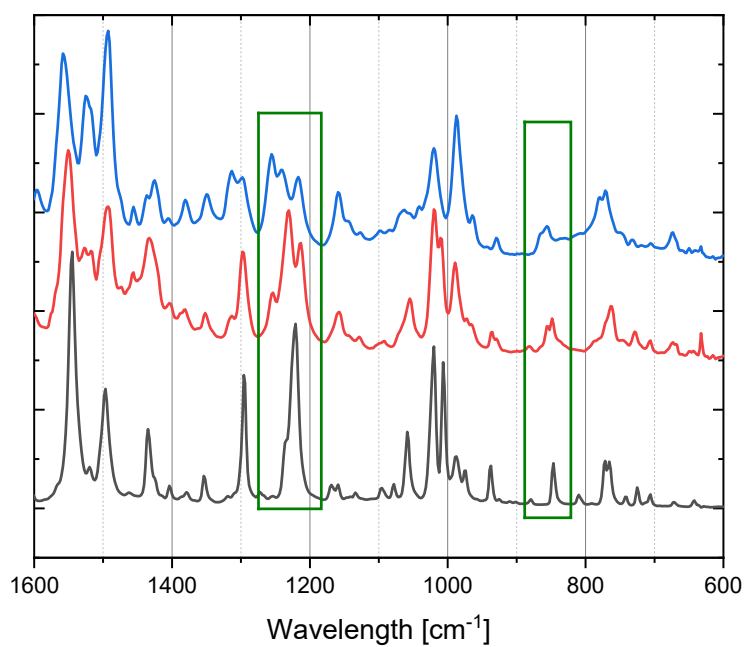

Figure S16: Infrared spectra of [FeDPPyCl<sub>2</sub>] precursor (black), after adding NaClO (red) then H<sub>2</sub><sup>18</sup>O (blue).

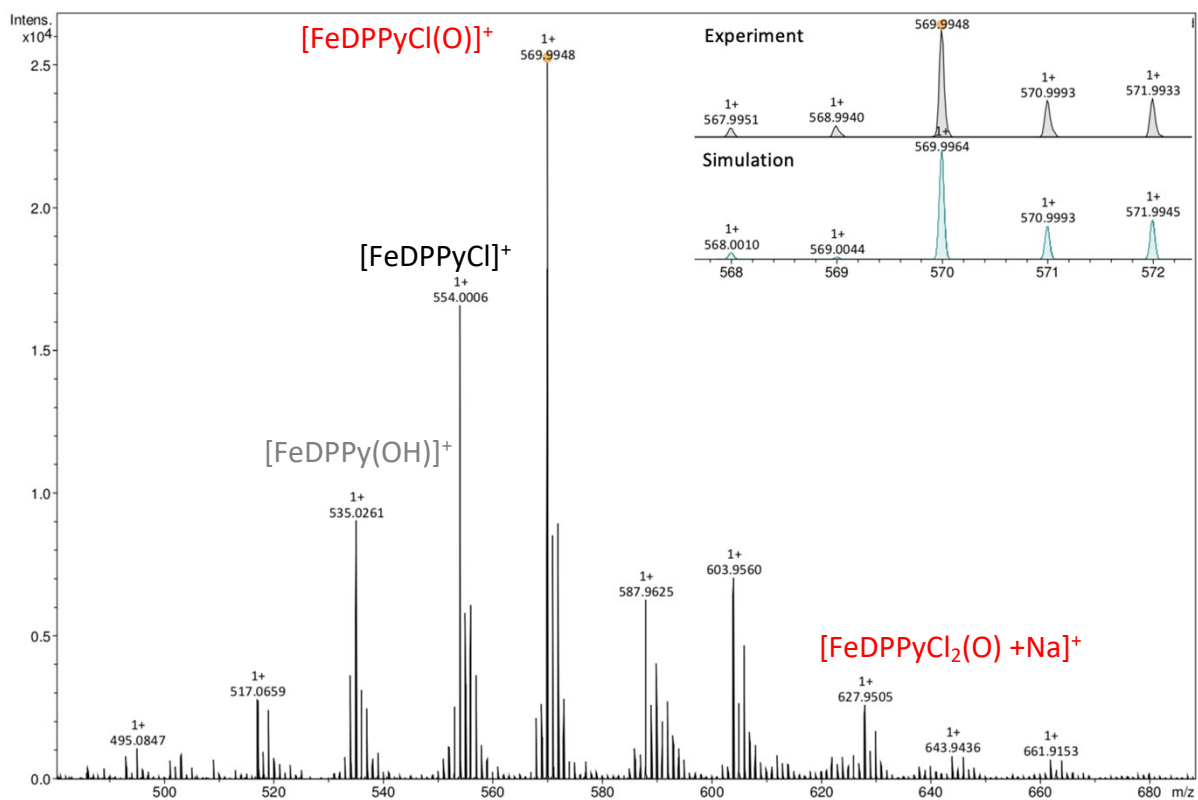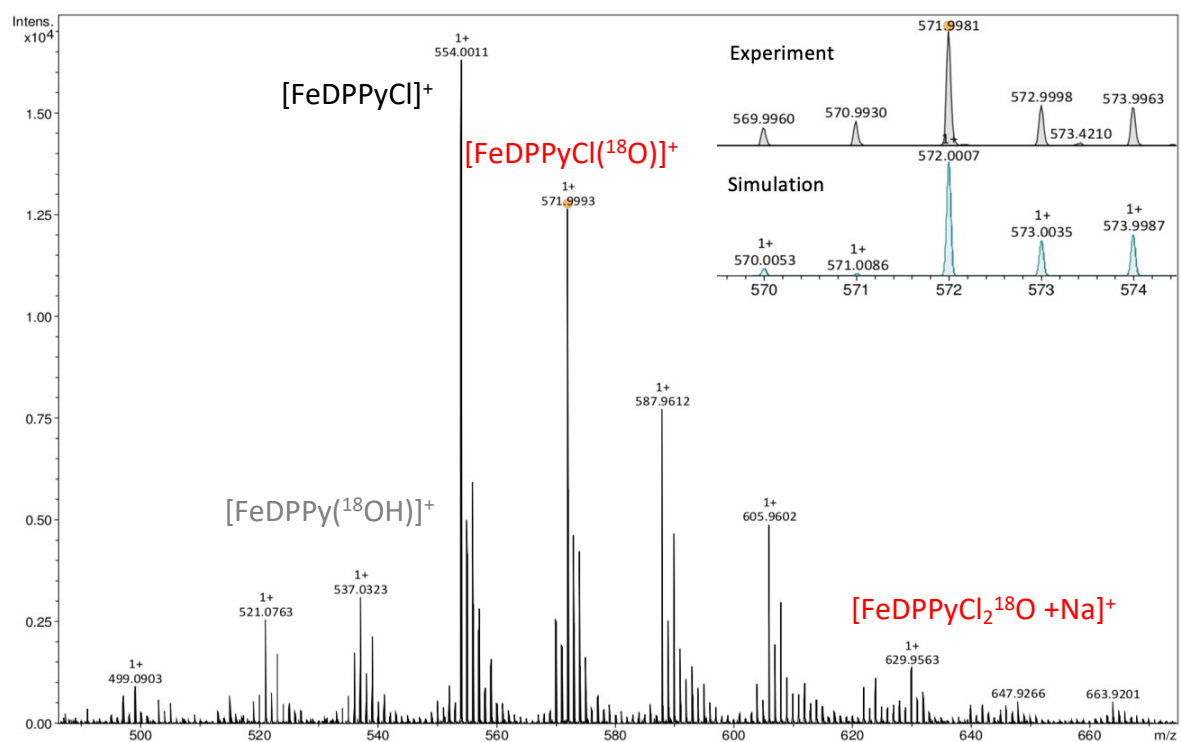

Figure S17: ESI<sup>+</sup>-HRMS analyses of  $[\text{FeDPPyCl}_2] + \text{NaClO}$  frozen solution in acetonitrile with  $\text{H}_2^{16}\text{O}$  (Top) with  $\text{H}_2^{16}\text{O}$   $\text{H}_2^{18}\text{O}$  (Bottom). Inset: Experimental and simulated isotopic distribution of detected species at  $m/z = 569.9948$  and  $571.9981$ .



## XI. DFT Calculations

Calculations are based on the density functional theory (DFT) and were performed with Gaussian 09 software package.<sup>8</sup> Geometries were optimized in the gas phase, using the B3LYP<sup>9</sup> functional which is known to perform well in IR prediction,<sup>10</sup> in combination with TZVP<sup>11</sup> (H,C,N,O,Cl,Fe) and the ECP implemented def2-SVP(I)<sup>12</sup> basis sets. Optimizations were followed by vibrational analysis to confirm the nature of minima or transition states and predict IR spectra. Figures of the structures were performed using ChemCraft or Mercury program. IR spectra were generated by convoluting the theoretical stick spectra with a gaussian fit available in Chemcraft.

Table S4: Comparison of some structural parameters between the geometry optimized <sup>5</sup>[FeDPPyCl<sub>2</sub>] and the X-ray characterized structures, distances in Angstrom, angles in degree.

|               | B3LYP/TZVP | XRD (form A) | XRD (form B) | XRD (form C) |
|---------------|------------|--------------|--------------|--------------|
| d(Fe-N3)      | 2.343      | 2.235        | 2.207        | 2.240        |
| d(Fe-N4)      | 2.343      | 2.235        | 2.238        | 2.240        |
| d(Fe-N1)      | 2.113      | 2.048        | 2.047        | 2.076        |
| d(Fe-N2)      | 2.113      | 2.048        | 2.073        | 2.076        |
| d(Fe-Cl1)     | 2.299      | 2.317        | 2.326        | 2.302        |
| d(Fe-Cl2)     | 2.299      | 2.317        | 2.308        | 2.302        |
| A(N1-Fe-N2)   | 81.9       | 82.5         | 81.5         | 81.2         |
| A(N1-Fe-N3)   | 72.9       | 75.2         | 74.16        | 75.4         |
| A(N2-Fe-N4)   | 72.9       | 75.2         | 74.16        | 75.3         |
| A(N3-Fe-N4)   | 132.2      | 127.1        | 127.2        | 131.4        |
| A(Cl1-Fe-Cl1) | 143.8      | 152          | 151.1        | 147.3        |

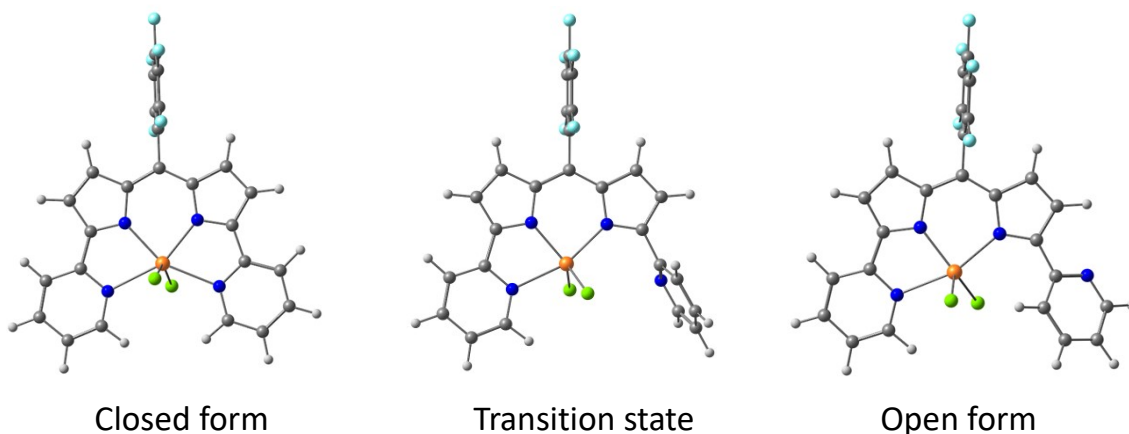

|                    | E (H)      | ΔE (kcal/mol) | G (H)      | ΔG (kcal/mol) |
|--------------------|------------|---------------|------------|---------------|
| <b>Closed form</b> | -3862.9833 | 0.0           | -3862.7304 | 0.0           |
| <b>TS</b>          | -3862.9686 | 9.3           | -3862.7159 | 9.1           |
| <b>Open form</b>   | -3862.9748 | 5.4           | -3862.7224 | 5.0           |

Figure S18: DFT optimized structures and energies of the closed and open forms of [FeDPPyCl<sub>2</sub>], as well as the transition state associated with the decooordination of one pyridine arm.

For the decooordination of one pyridine arm, an associated rate constant of  $10^7$  can be expected, based on the Eyring equation at 298K.

The structure of the computed  $[\text{Fe}(\text{DPPyO})\text{Cl}_2]$  species is given in the article (Fig. 3). Of note, isomers resulting from O insertion in one of the pyrrolic-Fe bond or oxidation of a pendant pyridine arm were calculated respectively 7 and 3 kcal/mol higher in energy.

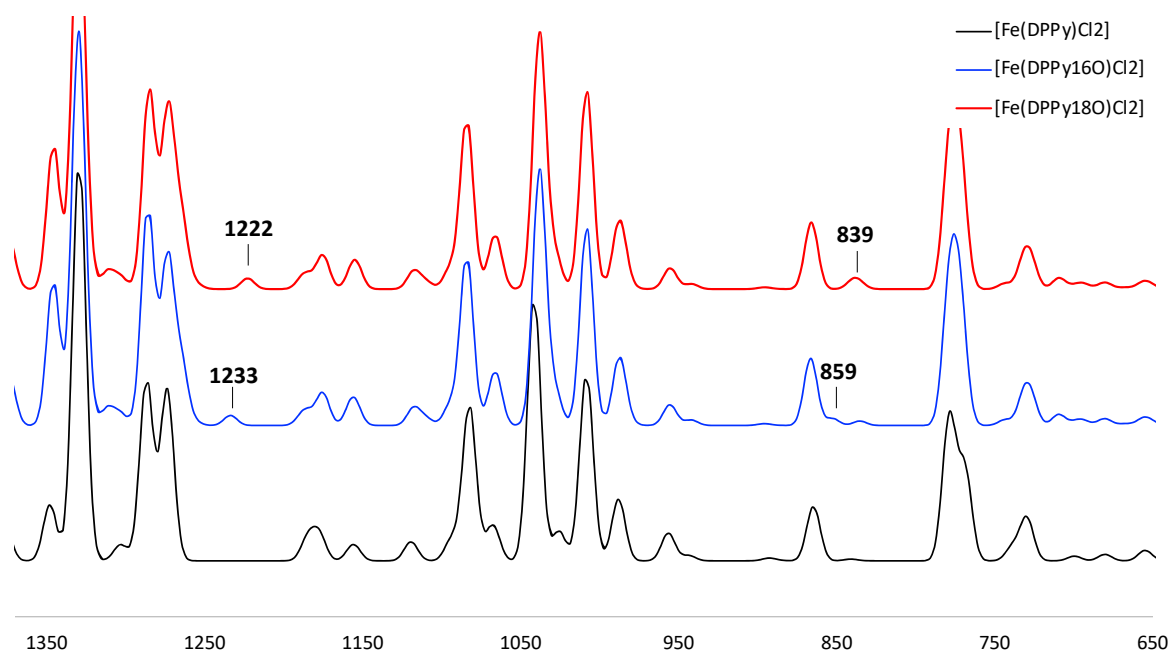

Figure S19: Comparison of the IR spectra calculated for  $[\text{Fe}(\text{DPPy})\text{Cl}_2]$  and  $[\text{Fe}(\text{DPPyO})\text{Cl}_2]$ . No scaling correction applied,  $W_{1/2}=10$  Gaussian broadening.

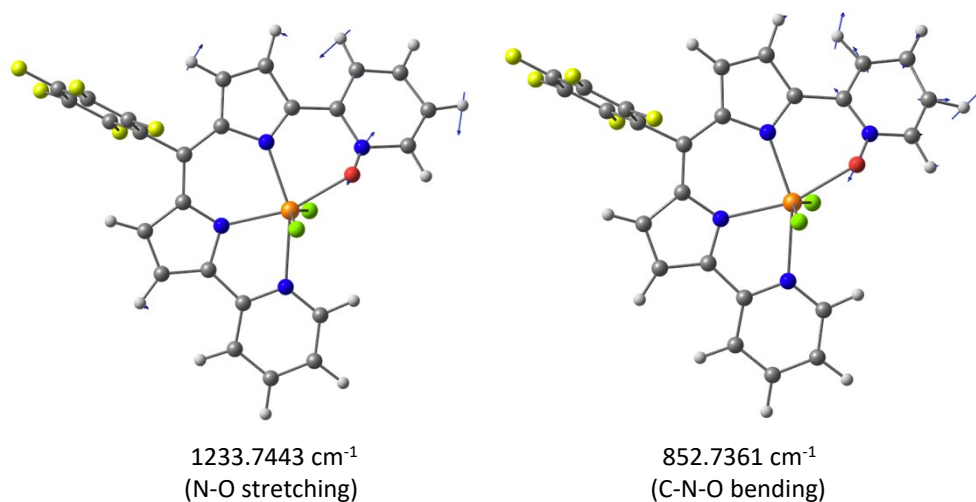

Figure S20: Scaled displacement vectors related to the main vibration modes of the N-O bond calculated for  $\text{Fe}(\text{DPPy}^{16}\text{O})\text{Cl}_2$ .

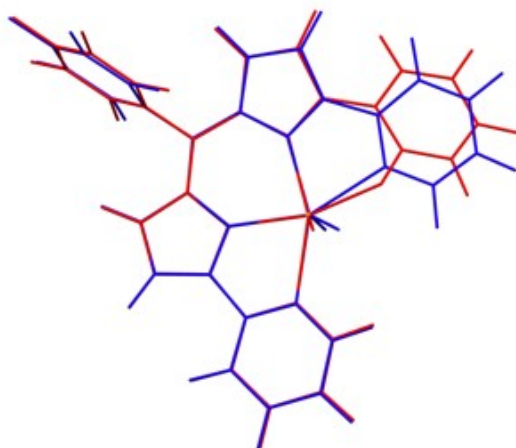

Figure S21: Overlay of the computed structures of  $[\text{FeDPPyCl}_2]$  (blue) and  $[\text{Fe}(\text{DPPyO})\text{Cl}_2]$  (red).

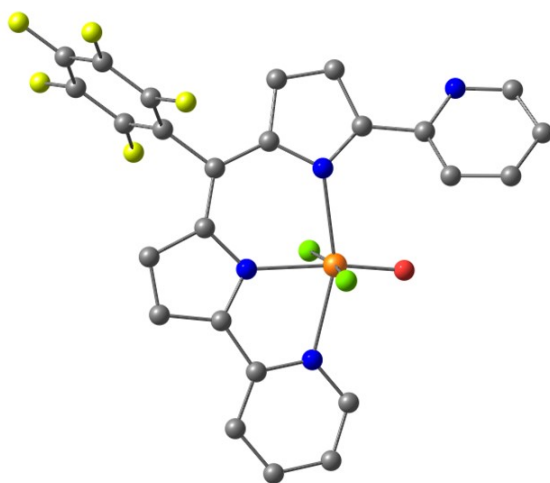

0.0 kcal/mol

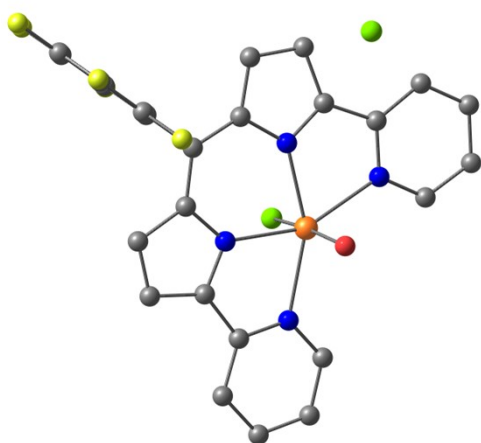

4.5 kcal/mol

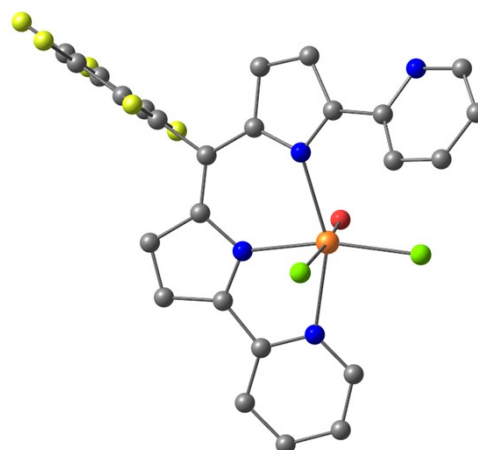

5.1 kcal/mol

Figure S22 Computed structures for the notional  $[\text{Fe}^{\text{V}}=\text{O}(\text{DPPy})\text{Cl}_2]$ ,  $S=5/2$  structures. H omitted, C grey, O red, N blue, F yellow, Cl green, Fe orange, I purple.

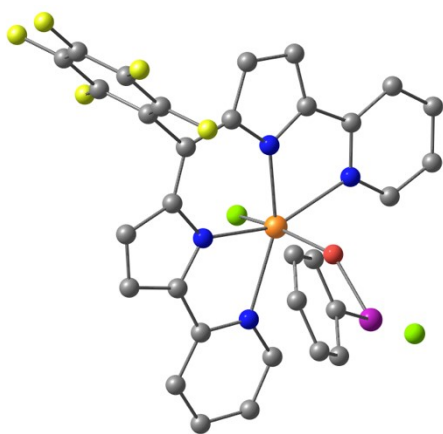

0.0 kcal/mol

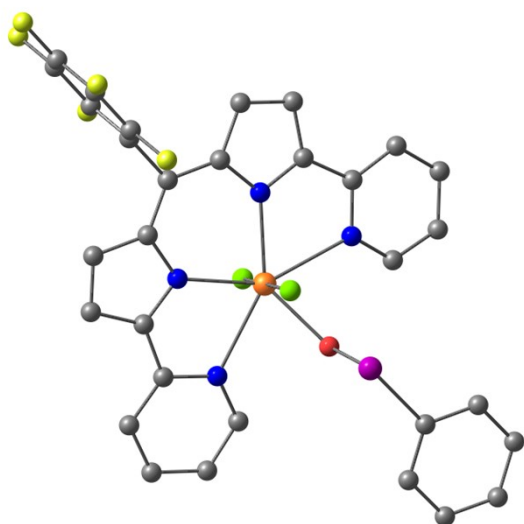

6.9 kcal/mol

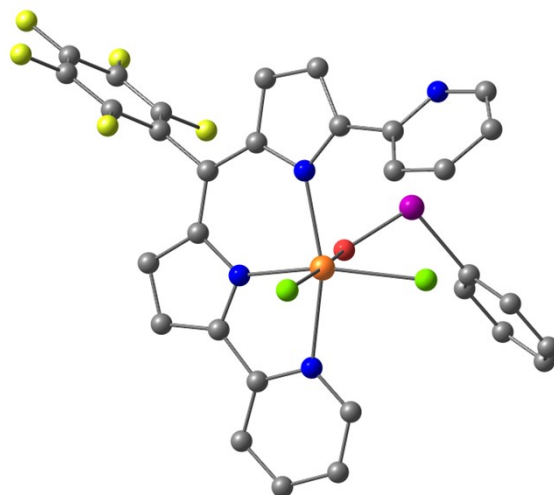

7.8 kcal/mol

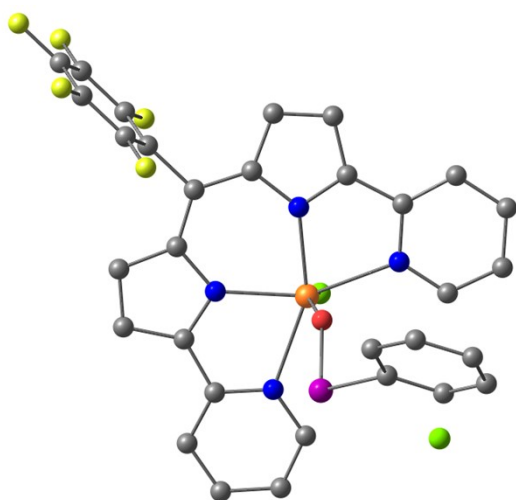

11.7 kcal/mol

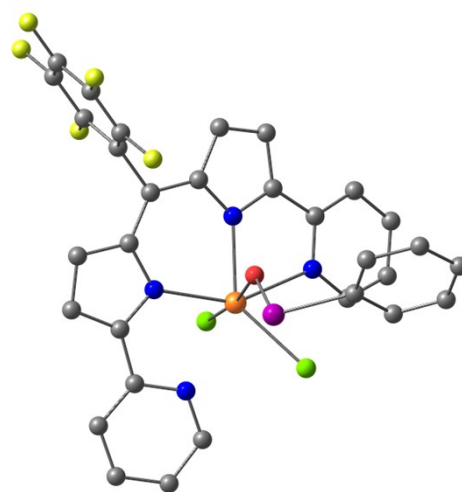

12.1 kcal/mol

Figure S23 Computed structures for the notional  $[\text{FeDPPyCl}_2(\text{OiPh})]$ ,  $S=5/2$  structures with their relative free energies. H omitted, C grey, O red, N blue, F yellow, Cl green, Fe orange.

Table S5 Coordinates of the most stable optimized geometries in their lower spin state, UB3LYP energies and thermal free energy at 298K.

**[FeDPPyCl<sub>2</sub>]**

Sextet

E(UB3LYP) = -3862.98334247 H

G = -3862.730383 H

|    |              |              |              |
|----|--------------|--------------|--------------|
| 26 | -2.020274000 | 0.000008000  | 0.000023000  |
| 6  | 5.898701000  | -0.000001000 | -0.000005000 |
| 17 | -2.733317000 | 0.000899000  | 2.185805000  |
| 9  | 7.231582000  | -0.000001000 | -0.000006000 |
| 9  | 5.872946000  | 0.000733000  | -2.357362000 |
| 6  | 5.203605000  | 0.000368000  | -1.201874000 |
| 9  | 3.173539000  | 0.000728000  | -2.362350000 |
| 6  | 3.814999000  | 0.000352000  | -1.189501000 |
| 7  | -0.423879000 | 1.384597000  | 0.000376000  |
| 6  | 0.948617000  | 1.238040000  | 0.000514000  |
| 6  | 1.595158000  | 0.000002000  | -0.000004000 |
| 6  | 3.091138000  | 0.000001000  | -0.000005000 |
| 7  | -2.968858000 | 2.142132000  | -0.000708000 |
| 6  | 1.548744000  | 2.535699000  | 0.000875000  |
| 1  | 2.606873000  | 2.742055000  | 0.001048000  |
| 6  | -0.679855000 | 2.699293000  | 0.000623000  |
| 6  | 0.525853000  | 3.452997000  | 0.001038000  |
| 1  | 0.614849000  | 4.527207000  | 0.001289000  |
| 6  | -2.064321000 | 3.137416000  | 0.000158000  |
| 6  | -2.458857000 | 4.478075000  | 0.000420000  |
| 1  | -1.715231000 | 5.262984000  | 0.001161000  |
| 6  | -3.811402000 | 4.778581000  | -0.000282000 |
| 1  | -4.141315000 | 5.809898000  | -0.000084000 |
| 6  | -4.737162000 | 3.740453000  | -0.001271000 |
| 1  | -5.801384000 | 3.932533000  | -0.001891000 |
| 6  | -4.265584000 | 2.434102000  | -0.001448000 |
| 1  | -4.947749000 | 1.593435000  | -0.002293000 |
| 9  | 5.872947000  | -0.000734000 | 2.357351000  |
| 6  | 5.203606000  | -0.000370000 | 1.201863000  |
| 9  | 3.173541000  | -0.000726000 | 2.362340000  |
| 6  | 3.815000000  | -0.000352000 | 1.189491000  |
| 7  | -0.423882000 | -1.384591000 | -0.000365000 |
| 6  | 0.948615000  | -1.238035000 | -0.000518000 |
| 7  | -2.968864000 | -2.142155000 | 0.000678000  |
| 6  | 1.548743000  | -2.535693000 | -0.000875000 |
| 1  | 2.606872000  | -2.742048000 | -0.001048000 |
| 6  | -0.679855000 | -2.699289000 | -0.000628000 |
| 6  | 0.525854000  | -3.452991000 | -0.001053000 |
| 1  | 0.614852000  | -4.527201000 | -0.001317000 |
| 6  | -2.064316000 | -3.137428000 | -0.000172000 |
| 6  | -2.458835000 | -4.478091000 | -0.000435000 |
| 1  | -1.715200000 | -5.262991000 | -0.001167000 |
| 6  | -3.811377000 | -4.778614000 | 0.000255000  |
| 1  | -4.141277000 | -5.809935000 | 0.000058000  |
| 6  | -4.737149000 | -3.740498000 | 0.001233000  |
| 1  | -5.801369000 | -3.932589000 | 0.001843000  |
| 6  | -4.265586000 | -2.434140000 | 0.001407000  |
| 1  | -4.947760000 | -1.593481000 | 0.002241000  |
| 17 | -2.733369000 | -0.000854000 | -2.185740000 |

**{[FeDPPyCl<sub>2</sub>]}<sup>‡</sup> pyridine decoordination**

Sextet

E(UB3LYP) = -3862.96855747 H

G = -3862.715939 H

One imaginary frequency : -40.7654 cm<sup>-1</sup>

|    |              |              |              |
|----|--------------|--------------|--------------|
| 26 | -1.957715000 | 0.335111367  | -0.039375532 |
| 6  | 5.869862000  | -0.216284000 | 0.003704000  |
| 17 | -3.120514165 | -0.197770798 | 1.798793936  |
| 9  | 7.200426000  | -0.289729000 | 0.007628000  |
| 9  | 5.846079000  | -0.290118633 | -2.352218000 |
| 6  | 5.176939000  | -0.218140000 | -1.199476000 |

|    |              |              |              |
|----|--------------|--------------|--------------|
| 9  | 3.150886000  | -0.140815633 | -2.364802000 |
| 6  | 3.790294000  | -0.139085633 | -1.191010000 |
| 7  | -0.327111000 | 1.572251000  | 0.008326367  |
| 6  | 1.025104000  | 1.326787000  | -0.014585266 |
| 6  | 1.571707000  | 0.029230000  | -0.006696633 |
| 6  | 3.066662000  | -0.063293000 | -0.004174000 |
| 7  | -2.792313000 | 2.454852000  | 0.066022266  |
| 6  | 1.713875000  | 2.568441000  | -0.024910899 |
| 1  | 2.783632000  | 2.699749000  | -0.041817532 |
| 6  | -0.492664000 | 2.912404000  | 0.013627367  |
| 6  | 0.755951000  | 3.566793000  | -0.005731899 |
| 1  | 0.927747000  | 4.631013000  | -0.006544899 |
| 6  | -1.851076000 | 3.418208000  | 0.048377000  |
| 6  | -2.200329000 | 4.770619000  | 0.065317000  |
| 1  | -1.430964000 | 5.530202000  | 0.049252367  |
| 6  | -3.542494000 | 5.112648000  | 0.100117266  |
| 1  | -3.838068000 | 6.154325000  | 0.112906266  |
| 6  | -4.504717000 | 4.107009000  | 0.121528899  |
| 1  | -5.560760000 | 4.336802000  | 0.148504165  |
| 6  | -4.081722000 | 2.785071000  | 0.102749899  |
| 1  | -4.784268000 | 1.961934000  | 0.116523165  |
| 9  | 5.841394000  | -0.138740367 | 2.359913000  |
| 6  | 5.174599000  | -0.137710000 | 1.203068000  |
| 9  | 3.146015000  | 0.012191633  | 2.357083000  |
| 6  | 3.788366000  | -0.060452000 | 1.186320000  |
| 7  | -0.541056000 | -1.273058633 | -0.009091633 |
| 6  | 0.858791000  | -1.158244000 | 0.007779633  |
| 7  | -2.736932330 | -3.345209074 | -1.181520303 |
| 6  | 1.427223000  | -2.471066000 | 0.062955330  |
| 1  | 2.480700000  | -2.699627367 | 0.083768596  |
| 6  | -0.809935000 | -2.582605000 | 0.033594431  |
| 6  | 0.387508000  | -3.355790000 | 0.089610862  |
| 1  | 0.426399633  | -4.434227367 | 0.122587293  |
| 6  | -2.170704367 | -3.186378633 | 0.018078798  |
| 6  | -2.756388037 | -3.635012558 | 1.204721633  |
| 1  | -2.262306340 | -3.477052952 | 2.153507367  |
| 6  | -3.994656670 | -4.257537293 | 1.134650633  |
| 1  | -4.482946606 | -4.608444420 | 2.037010734  |
| 6  | -4.597547633 | -4.412720734 | -0.106947468 |
| 1  | -5.566791633 | -4.888905468 | -0.207895468 |
| 6  | -3.929986330 | -3.940220442 | -1.231379936 |
| 1  | -4.364493027 | -4.042573048 | -2.221270037 |
| 17 | -2.961371835 | 0.037502697  | -1.997061431 |

**[FeDPPyCl<sub>2</sub>] open form**

Sextet

E(UB3LYP) = -3862.97476391 H

G = -3862.722350 H

|    |              |              |              |
|----|--------------|--------------|--------------|
| 26 | 1.957438000  | 0.366005000  | -0.096090000 |
| 6  | -5.839614000 | -0.185619000 | -0.000549000 |
| 17 | 2.723403000  | 0.284047000  | -2.205161000 |
| 9  | -7.170254000 | -0.256015000 | 0.002335000  |
| 9  | -5.830385000 | 0.232186000  | 2.319730000  |
| 6  | -5.154095000 | 0.065209000  | 1.180704000  |
| 9  | -3.136157000 | 0.375187000  | 2.319677000  |
| 6  | -3.767741000 | 0.138598000  | 1.164905000  |
| 7  | 0.351327000  | 1.598832000  | 0.043015000  |
| 6  | -0.997706000 | 1.353882000  | -0.023097000 |
| 6  | -1.540363000 | 0.052284000  | -0.012490000 |
| 6  | -3.034834000 | -0.038883000 | -0.006050000 |
| 7  | 2.817392000  | 2.474295000  | 0.112397000  |
| 6  | -1.683605000 | 2.593827000  | -0.068112000 |
| 1  | -2.751860000 | 2.726013000  | -0.124034000 |
| 6  | 0.520766000  | 2.941614000  | 0.040317000  |
| 6  | -0.724541000 | 3.593589000  | -0.027117000 |
| 1  | -0.896521000 | 4.657670000  | -0.043760000 |

|    |              |              |              |
|----|--------------|--------------|--------------|
| 6  | 1.879050000  | 3.441728000  | 0.098734000  |
| 6  | 2.233484000  | 4.792294000  | 0.145785000  |
| 1  | 1.466755000  | 5.554708000  | 0.136660000  |
| 6  | 3.576118000  | 5.128655000  | 0.204231000  |
| 1  | 3.874967000  | 6.168859000  | 0.239963000  |
| 6  | 4.534881000  | 4.119279000  | 0.220600000  |
| 1  | 5.591259000  | 4.344539000  | 0.268669000  |
| 6  | 4.107416000  | 2.799683000  | 0.173937000  |
| 1  | 4.806827000  | 1.973887000  | 0.191146000  |
| 9  | -5.795904000 | -0.599500000 | -2.320797000 |
| 6  | -5.136404000 | -0.362134000 | -1.184565000 |
| 9  | -3.102148000 | -0.457434000 | -2.332307000 |
| 6  | -3.749664000 | -0.288117000 | -1.174970000 |
| 7  | 0.569659000  | -1.279413000 | -0.039034000 |
| 6  | -0.829346000 | -1.135403000 | 0.020151000  |
| 7  | 2.199388000  | -4.332453000 | 0.914411000  |
| 6  | -1.418658000 | -2.431220000 | 0.202992000  |
| 1  | -2.474748000 | -2.631371000 | 0.279683000  |
| 6  | 0.813442000  | -2.592633000 | 0.112300000  |
| 6  | -0.400484000 | -3.328889000 | 0.285897000  |
| 1  | -0.447750000 | -4.392942000 | 0.441242000  |
| 6  | 2.118869000  | -3.275894000 | 0.086218000  |
| 6  | 3.156354000  | -2.926797000 | -0.779726000 |
| 1  | 3.046633000  | -2.103080000 | -1.468513000 |
| 6  | 4.327672000  | -3.670663000 | -0.750768000 |
| 1  | 5.146006000  | -3.418783000 | -1.413821000 |
| 6  | 4.429141000  | -4.736093000 | 0.132358000  |
| 1  | 5.325987000  | -5.339343000 | 0.190802000  |
| 6  | 3.331525000  | -5.027119000 | 0.939051000  |
| 1  | 3.362277000  | -5.862692000 | 1.631029000  |
| 17 | 3.294013000  | -0.295771000 | 1.568198000  |

### Fe(DPPy<sup>16</sup>O)Cl<sub>2</sub>

Sextet

E(UB3LYP) = -3938.17018177 H

G = -3937.912925 H

|    |              |              |              |
|----|--------------|--------------|--------------|
| 26 | 1.943173000  | -0.243611000 | 0.302443000  |
| 6  | -5.909878000 | 0.157789000  | -0.026818772 |
| 17 | 1.895763000  | -0.863121000 | 2.527138000  |
| 9  | -7.241506000 | 0.217247000  | -0.031358000 |
| 9  | -5.886743000 | 0.096251000  | -2.392647228 |
| 6  | -5.221377228 | 0.094187000  | -1.228128772 |
| 9  | -3.191560000 | -0.023255000 | -2.394116000 |
| 6  | -3.829874000 | 0.035085228  | -1.220116000 |
| 7  | 0.312373087  | -1.500901228 | -0.196459000 |
| 6  | -1.040591456 | -1.281819315 | -0.189877228 |
| 6  | -1.605234772 | -0.008549402 | -0.014957315 |
| 6  | -3.099918772 | 0.013463087  | -0.035875228 |
| 7  | 2.833722000  | -2.335238772 | -0.027070000 |
| 6  | -1.672375544 | -2.564347000 | -0.351336000 |
| 1  | -2.732436315 | -2.749110913 | -0.385455000 |
| 6  | 0.538567772  | -2.812546456 | -0.343570000 |
| 6  | -0.684308544 | -3.522502685 | -0.457619000 |
| 1  | -0.824364228 | -4.585262685 | -0.590829228 |
| 6  | 1.914395000  | -3.284744000 | -0.303961000 |
| 6  | 2.283641000  | -4.617980228 | -0.521401000 |
| 1  | 1.530371000  | -5.360026228 | -0.747689000 |
| 6  | 3.624223000  | -4.958105000 | -0.444853000 |
| 1  | 3.938879228  | -5.982537000 | -0.608378000 |
| 6  | 4.562928000  | -3.973133000 | -0.158719000 |
| 1  | 5.613344772  | -4.201417000 | -0.091194000 |
| 6  | 4.123334228  | -2.667133772 | 0.039404000  |
| 1  | 4.819871456  | -1.867737000 | 0.256473000  |
| 9  | -5.881121000 | 0.217776000  | 2.324784000  |
| 6  | -5.209243772 | 0.159280000  | 1.174340228  |
| 9  | -3.185760000 | 0.098227000  | 2.330005000  |
| 6  | -3.817323544 | 0.103019228  | 1.153520772  |
| 7  | 0.478190685  | 1.313575141  | 0.126577228  |
| 6  | -0.923244685 | 1.196485141  | 0.084987544  |
| 7  | 3.188623456  | 2.499392000  | 0.393615772  |
| 6  | -1.535551282 | 2.468405544  | 0.080515000  |

|    |              |             |              |
|----|--------------|-------------|--------------|
| 1  | -2.589636282 | 2.705556228 | 0.087089685  |
| 6  | 0.780273826  | 2.607055000 | 0.070685772  |
| 6  | -0.468837685 | 3.335433946 | 0.054671000  |
| 1  | -0.564782826 | 4.406129718 | 0.052802228  |
| 6  | 2.156556108  | 3.137410174 | -0.026075631 |
| 6  | 2.379427021  | 4.347763120 | -0.607901946 |
| 1  | 1.421896228  | 4.774425099 | -0.889221925 |
| 6  | 3.552394456  | 5.030886424 | -0.815289598 |
| 1  | 3.700323141  | 5.986275967 | -1.290634826 |
| 6  | 4.505225153  | 4.175883033 | -0.299030631 |
| 1  | 5.565654663  | 4.402155729 | -0.390170402 |
| 6  | 4.370390033  | 2.971745174 | 0.272032913  |
| 1  | 5.173066402  | 2.338197631 | 0.607815402  |
| 8  | 3.090541141  | 1.484569619 | 0.976686033  |
| 17 | 2.917583000  | 0.174871000 | -1.792316000 |

### [FeDPPy(O)Cl<sub>2</sub>]

Quartet

E(UB3LYP) = -3938.11094925 H

G = -3937.857327 H

|    |              |              |              |
|----|--------------|--------------|--------------|
| 26 | 2.088669000  | -0.307154000 | -0.172854000 |
| 17 | 2.364505000  | -0.234102000 | 2.179385000  |
| 7  | 0.454913000  | -1.522529000 | 0.203292000  |
| 7  | 2.917914000  | -2.392655000 | -0.066100000 |
| 7  | 0.560217000  | 1.380926000  | -0.040051000 |
| 8  | 3.480751000  | 0.485228000  | -0.484979000 |
| 17 | 1.551785000  | -0.585889000 | -2.420002000 |
| 6  | -0.890313000 | -1.288094000 | 0.290350000  |
| 6  | 0.653819000  | -2.820036000 | 0.381628000  |
| 6  | -1.482382000 | -0.042814000 | 0.063475000  |
| 6  | -1.564251000 | -2.547790000 | 0.579990000  |
| 6  | -2.978524000 | 0.001019000  | 0.058916000  |
| 6  | -3.719292000 | -0.497762000 | -1.011300000 |
| 6  | -5.107590000 | -0.462484000 | -1.020084000 |
| 6  | -5.786092000 | 0.077211000  | 0.064815000  |
| 9  | -7.116853000 | 0.112852000  | 0.067665000  |
| 6  | -5.075219000 | 0.578226000  | 1.147698000  |
| 9  | -5.791757000 | -0.941512000 | -2.060172000 |
| 9  | -3.095050000 | -1.020054000 | -2.069907000 |
| 6  | -0.804014000 | 1.163603000  | -0.171348000 |
| 6  | -3.687726000 | 0.536703000  | 1.132666000  |
| 6  | 2.003441000  | -3.332551000 | 0.252033000  |
| 6  | 4.185835000  | -2.736029000 | -0.232716000 |
| 1  | -2.624642000 | -2.675916000 | 0.720819000  |
| 6  | -0.603741000 | -3.501963000 | 0.635372000  |
| 1  | -0.733850000 | -4.554787000 | 0.826237000  |
| 6  | 2.357731000  | -4.671751000 | 0.412983000  |
| 1  | 1.610238000  | -5.410366000 | 0.668316000  |
| 6  | 3.688254000  | -5.032173000 | 0.239571000  |
| 1  | 3.993571000  | -6.063848000 | 0.359223000  |
| 6  | 4.617738000  | -4.054943000 | -0.089668000 |
| 1  | 5.661606000  | -4.298743000 | -0.233515000 |
| 1  | 4.863794000  | -1.930192000 | -0.485418000 |
| 9  | -5.727853000 | 1.091730000  | 2.191647000  |
| 9  | -3.030606000 | 1.021628000  | 2.190639000  |
| 6  | 0.751336000  | 2.675464000  | -0.279106000 |
| 6  | -1.465153000 | 2.404503000  | -0.554991000 |
| 7  | 2.035856000  | 4.580349000  | -0.806655000 |
| 6  | 1.991424000  | 3.418288000  | -0.118303000 |
| 6  | 3.128133000  | 5.320407000  | -0.706304000 |
| 1  | -2.520477000 | 2.522763000  | -0.735480000 |
| 6  | -0.501552000 | 3.339300000  | -0.651758000 |
| 1  | -0.579159000 | 4.379364000  | -0.917772000 |
| 6  | 3.019470000  | 3.005225000  | 0.739664000  |
| 1  | 2.927775000  | 2.093794000  | 1.312168000  |
| 6  | 4.147472000  | 3.808049000  | 0.845408000  |
| 1  | 4.958923000  | 3.515400000  | 1.499320000  |
| 6  | 4.215885000  | 4.976691000  | 0.102878000  |
| 1  | 5.080601000  | 5.626243000  | 0.152521000  |
| 1  | 3.141914000  | 6.238081000  | -1.285355000 |

**[FeDPPyCl(OiPh)]Cl**

Sextet

E(UB3LYP) = -4467.66812150 H

G = -4467.336103 H

|    |              |              |              |
|----|--------------|--------------|--------------|
| 26 | -1.132646000 | -1.096511000 | -0.628789000 |
| 6  | 6.652109000  | 0.241294000  | 0.105099000  |
| 17 | -5.174804000 | -0.317469000 | 0.395991000  |
| 9  | 7.961026000  | 0.461443000  | 0.222824000  |
| 9  | 7.029529000  | -1.183080000 | -1.734172000 |
| 6  | 6.174455000  | -0.596688000 | -0.893599000 |
| 9  | 4.380307000  | -1.632661000 | -1.976121000 |
| 6  | 4.808073000  | -0.817948000 | -1.007488000 |
| 7  | 0.362327000  | 0.171492000  | -1.428050000 |
| 6  | 1.715293000  | 0.309534000  | -1.196297000 |
| 6  | 2.423297000  | -0.467857000 | -0.275610000 |
| 6  | 3.892509000  | -0.221906000 | -0.143439000 |
| 7  | -2.188913000 | 0.261164000  | -2.188369000 |
| 6  | 2.223390000  | 1.335867000  | -2.052314000 |
| 1  | 3.246520000  | 1.672975000  | -2.096145000 |
| 6  | 0.031533000  | 1.048807000  | -2.383215000 |
| 6  | 1.166882000  | 1.797977000  | -2.799599000 |
| 1  | 1.189492000  | 2.571987000  | -3.549441000 |
| 6  | -1.345609000 | 1.087022000  | -2.842770000 |
| 6  | -1.785308000 | 1.888058000  | -3.897647000 |
| 1  | -1.090434000 | 2.540594000  | -4.407868000 |
| 6  | -3.116377000 | 1.822917000  | -4.281513000 |
| 1  | -3.478484000 | 2.433632000  | -5.099228000 |
| 6  | -3.973324000 | 0.962161000  | -3.608039000 |
| 1  | -5.019053000 | 0.881456000  | -3.870684000 |
| 6  | -3.466314000 | 0.195507000  | -2.564776000 |
| 1  | -4.107318000 | -0.461882000 | -1.992195000 |
| 9  | 6.221094000  | 1.657864000  | 1.940778000  |
| 6  | 5.763165000  | 0.849888000  | 0.980941000  |
| 9  | 3.570648000  | 1.215799000  | 1.707496000  |

|    |              |              |              |
|----|--------------|--------------|--------------|
| 6  | 4.402179000  | 0.611506000  | 0.848118000  |
| 7  | 0.516732000  | -1.790054000 | 0.498532000  |
| 6  | 1.858473000  | -1.466169000 | 0.520694000  |
| 7  | -1.945609000 | -2.735879000 | 0.768687000  |
| 6  | 2.519452000  | -2.324742000 | 1.454119000  |
| 1  | 3.571894000  | -2.312669000 | 1.687910000  |
| 6  | 0.336276000  | -2.797037000 | 1.361250000  |
| 6  | 1.564099000  | -3.160375000 | 1.980946000  |
| 1  | 1.711255000  | -3.937374000 | 2.713344000  |
| 6  | -1.002935000 | -3.336170000 | 1.522230000  |
| 6  | -1.319949000 | -4.387094000 | 2.382765000  |
| 1  | -0.546471000 | -4.855603000 | 2.975555000  |
| 6  | -2.637714000 | -4.814274000 | 2.461379000  |
| 1  | -2.908350000 | -5.627939000 | 3.122744000  |
| 6  | -3.601267000 | -4.181429000 | 1.687706000  |
| 1  | -4.641832000 | -4.472420000 | 1.727438000  |
| 6  | -3.210188000 | -3.142369000 | 0.849191000  |
| 1  | -3.934831000 | -2.599648000 | 0.256542000  |
| 17 | -1.285009000 | -2.683101000 | -2.267583000 |
| 6  | -1.899878000 | 4.209717000  | 1.594944000  |
| 6  | -0.939771000 | 5.147038000  | 1.968190000  |
| 6  | -1.562128000 | 2.860929000  | 1.570511000  |
| 1  | -1.195794000 | 6.199525000  | 1.987606000  |
| 6  | 0.344954000  | 4.731419000  | 2.305317000  |
| 6  | -0.286087000 | 2.432503000  | 1.908241000  |
| 1  | 1.092235000  | 5.461422000  | 2.590964000  |
| 1  | -0.041171000 | 1.379332000  | 1.878204000  |
| 6  | 0.670402000  | 3.378519000  | 2.271299000  |
| 1  | 1.670570000  | 3.052416000  | 2.528817000  |
| 1  | -2.895911000 | 4.542760000  | 1.320797000  |
| 53 | -3.139486000 | 1.457335000  | 1.065573000  |
| 8  | -1.879663000 | 0.076339000  | 0.744151000  |

Table S6 Calculated frequencies (cm<sup>-1</sup>) with their IR intensities at 298K.**[FeDPPyCl<sub>2</sub>] closed form**

|          |         |          |          |           |          |
|----------|---------|----------|----------|-----------|----------|
| 10.5208  | 0       | 297.9634 | 0        | 739.1427  | 15.49    |
| 24.998   | 0.0709  | 302.7783 | 0.0038   | 766.4145  | 0.0002   |
| 30.88    | 0       | 313.6707 | 1.2666   | 769.015   | 100.0657 |
| 34.334   | 0.0975  | 343.783  | 0.5647   | 772.9742  | 0.0005   |
| 41.9139  | 3.1387  | 352.414  | 122.7091 | 776.804   | 29.6756  |
| 53.3409  | 3.507   | 382.2636 | 0.7568   | 779.4587  | 137.7033 |
| 60.7047  | 0       | 383.9931 | 0        | 841.3345  | 1.939    |
| 65.1986  | 0.1785  | 404.7876 | 10.3705  | 865.0581  | 61.7417  |
| 81.5071  | 0.8487  | 422.2005 | 7.38     | 881.1302  | 0        |
| 86.5492  | 0.5098  | 429.2602 | 0        | 884.5133  | 0.2029   |
| 111.3106 | 0.2257  | 432.0852 | 6.0876   | 890.5744  | 0        |
| 112.017  | 0       | 442.0094 | 0.6509   | 893.0336  | 3.1166   |
| 123.5303 | 0.5468  | 448.8335 | 0.1807   | 944.0226  | 6.0784   |
| 128.5594 | 4.9692  | 484.2863 | 2.7777   | 954.0501  | 0        |
| 131.1056 | 1.472   | 485.084  | 0.0005   | 956.8788  | 31.3877  |
| 131.6355 | 0       | 486.6201 | 0.4107   | 960.6608  | 0.1794   |
| 144.307  | 1.7417  | 527.6344 | 0.0227   | 988.3647  | 69.5065  |
| 172.3002 | 0.0014  | 534.8475 | 1.6506   | 991.106   | 0        |
| 185.1391 | 0       | 561.6856 | 0.4491   | 991.2131  | 0.632    |
| 197.9609 | 0.5276  | 586.6799 | 0.582    | 1008.6787 | 212.9742 |
| 201.127  | 1.6161  | 648.7162 | 0.2639   | 1026.0365 | 33.5929  |
| 210.3295 | 0.0252  | 651.2475 | 0        | 1027.9791 | 0.2873   |
| 213.4923 | 0       | 652.2897 | 1.1712   | 1041.7669 | 299.6442 |
| 229.6654 | 0.0007  | 655.4785 | 10.8131  | 1067.6802 | 38.8122  |
| 239.562  | 5.8269  | 664.7501 | 0        | 1070.0207 | 0.1088   |
| 255.2482 | 5.2817  | 678.3515 | 0        | 1073.2559 | 4.2272   |
| 281.1087 | 0.0522  | 680.5614 | 7.2926   | 1082.8322 | 176.4822 |
| 283.7431 | 0.0339  | 699.9319 | 5.316    | 1094.0341 | 24.5004  |
| 289.4331 | 14.3709 | 723.896  | 0.174    | 1116.9585 | 0.4998   |
| 289.8872 | 24.9264 | 729.5397 | 28.2453  | 1119.8006 | 21.1685  |
|          |         | 730.82   | 21.2683  | 1155.3563 | 5.8165   |
|          |         | 733.9762 | 0        | 1155.9491 | 9.4379   |





|          |          |           |          |           |          |
|----------|----------|-----------|----------|-----------|----------|
| 179.3591 | 0.501    | 699.0001  | 3.1991   | 1264.9248 | 71.9119  |
| 197.276  | 0.2527   | 709.1719  | 11.4775  | 1273.3094 | 181.9731 |
| 199.8393 | 1.4834   | 726.65    | 23.083   | 1285.2761 | 205.0748 |
| 217.0419 | 1.2083   | 731.283   | 29.0819  | 1298.5201 | 0.8631   |
| 220.9042 | 9.6199   | 743.3784  | 5.9259   | 1303.7087 | 12.289   |
| 228.8516 | 0.3226   | 769.9873  | 35.0298  | 1311.626  | 18.1794  |
| 238.6734 | 7.1943   | 772.3356  | 94.0739  | 1327.307  | 72.8735  |
| 246.0968 | 1.2532   | 776.5672  | 34.8513  | 1330.2654 | 346.6245 |
| 260.1805 | 6.2826   | 777.6106  | 27.7294  | 1345.8207 | 149.1953 |
| 281.3571 | 0.1397   | 779.4523  | 83.3535  | 1374.113  | 52.1809  |
| 283.8151 | 0.1988   | 835.3145  | 5.0187   | 1405.8785 | 100.9168 |
| 289.3957 | 15.1164  | 839.612   | 8.2109   | 1434.2596 | 0.4756   |
| 297.8494 | 10.3279  | 865.9626  | 68.7655  | 1453.1052 | 89.8643  |
| 304.2777 | 0.3311   | 869.1672  | 0.125    | 1454.7953 | 19.3702  |
| 312.8824 | 1.2928   | 888.0652  | 0.1026   | 1464.7837 | 11.9646  |
| 327.5958 | 25.5703  | 894.2537  | 0.1335   | 1474.5641 | 49.4043  |
| 336.2581 | 107.8077 | 895.8107  | 1.7097   | 1490.431  | 22.6369  |
| 343.2555 | 8.307    | 941.774   | 5.1796   | 1512.1444 | 335.0233 |
| 370.2241 | 6.7481   | 948.9387  | 0.5353   | 1518.2497 | 122.7871 |
| 384.239  | 0.0277   | 955.4443  | 21.4838  | 1524.7186 | 66.3704  |
| 395.3538 | 1.1968   | 967.6453  | 0.0454   | 1527.2326 | 213.9701 |
| 418.4127 | 6.5994   | 980.8969  | 3.0022   | 1533.6003 | 180.5715 |
| 422.8778 | 5.774    | 987.4252  | 70.8277  | 1556.7035 | 45.5064  |
| 432.2469 | 3.2428   | 993.0338  | 0.4615   | 1587.1313 | 564.265  |
| 448.8747 | 0.1437   | 1008.2848 | 205.7364 | 1596.0231 | 94.6947  |
| 454.4391 | 1.3386   | 1028.3265 | 35.6048  | 1612.1395 | 16.2492  |
| 486.2547 | 0.8765   | 1038.0982 | 264.2649 | 1639.7523 | 21.7382  |
| 490.3672 | 0.5019   | 1066.0304 | 54.5059  | 1645.9087 | 5.2789   |
| 505.6997 | 2.237    | 1071.0297 | 2.6299   | 1652.8117 | 5.1948   |
| 518.6859 | 2.0204   | 1074.4825 | 0.9812   | 1667.8554 | 29.5529  |
| 529.865  | 0.8547   | 1084.1379 | 176.4037 | 3186.6571 | 8.9121   |
| 563.8062 | 8.0663   | 1094.6154 | 21.2587  | 3193.3796 | 1.2776   |
| 565.704  | 4.3227   | 1109.8466 | 7.2532   | 3202.0055 | 3.4581   |
| 586.1053 | 0.6413   | 1117.6565 | 18.539   | 3208.1206 | 5.2899   |
| 593.5837 | 7.0812   | 1153.7848 | 8.6755   | 3213.8367 | 8.1347   |
| 650.6118 | 2.9664   | 1155.0464 | 18.7455  | 3218.1179 | 1.0691   |
| 655.2439 | 5.678    | 1158.0343 | 4.2267   | 3228.9435 | 0.1531   |
| 657.943  | 1.5306   | 1175.2259 | 34.6598  | 3240.6488 | 2.5339   |
| 667.6256 | 1.6839   | 1184.7761 | 10.716   | 3243.5644 | 2.8692   |
| 678.7326 | 3.6861   | 1188.6174 | 7.6751   | 3254.9728 | 1.6784   |
| 681.7433 | 3.6362   | 1222.8435 | 11.0955  | 3257.1105 | 5.0388   |
| 693.588  | 4.9211   | 1255.6808 | 5.3597   | 3260.2012 | 4.2946   |

## References

---

- <sup>1</sup> G. M. Sheldrick, *SHELXS-97*, Program for Crystal Structure Solution, University of Göttingen, Göttingen, Germany, 1997
- <sup>2</sup> G. M. Sheldrick, *Acta Crystallogr. A* 2008, **64**, 112–122.
- <sup>3</sup> L. J. Farrugia, *J. Appl. Crystallogr.* 1999, **32**, 837–838.
- <sup>4</sup> C. Ducloiset, P. Jouin, E. Paredes, R. Guillot, M. Sircoglou, M. Orio, W. Leibl and A. Aukauloo, *Eur. J. Inorg. Chem.*, 2015, 5405.
- <sup>5</sup> J. G. Sharefkin, H. Saltzman, *Org. Synth.* 1963, **43**, 60.
- <sup>6</sup> M. R. Mills, A. C. Weitz, M. P. Hendrich, A. D. Ryabov, T. J. Collins, *J. Am. Chem. Soc.* 2016, **138**, 13866.
- <sup>7</sup> Similarly broad and ill-defined signals were observed with parent dipyrin iron complexes : C. Kleinlein, S. L. Zheng, T. A. Betley, *Inorg. Chem.*, 2017, **56**, 5892.
- <sup>8</sup> Gaussian 09, Revision D.01, M. J. Frisch, G. W. Trucks, H. B. Schlegel, G. E. Scuseria, M. A. Robb, J. R. Cheeseman, G. Scalmani, V. Barone, B. Mennucci, G. A. Petersson, H. Nakatsuji, M. Caricato, X. Li, H. P. Hratchian, A. F. Izmaylov, J. Bloino, G. Zheng, J. L. Sonnenberg, M. Hada, M. Ehara, K. Toyota, R. Fukuda, J. Hasegawa, M. Ishida, T. Nakajima, Y. Honda, O. Kitao, H. Nakai, T. Vreven, J. A. Montgomery, Jr., J. E. Peralta, F. Ogliaro, M. Bearpark, J. J. Heyd, E. Brothers, K. N. Kudin, V. N. Staroverov, T. Keith, R. Kobayashi, J. Normand, K. Raghavachari, A. Rendell, J. C. Burant, S. S. Iyengar, J. Tomasi, M. Cossi, N. Rega, J. M. Millam, M. Klene, J. E. Knox, J. B. Cross, V. Bakken, C. Adamo, J. Jaramillo, R. Gomperts, R. E. Stratmann, O. Yazyev, A. J. Austin, R. Cammi, C. Pomelli, J. W. Ochterski, R. L. Martin, K. Morokuma, V. G. Zakrzewski, G. A. Voth, P. Salvador, J. J. Dannenberg, S. Dapprich, A. D. Daniels, O. Farkas, J. B. Foresman, J. V. Ortiz, J. Cioslowski, and D. J. Fox, Gaussian, Inc., Wallingford CT, 2013.
- <sup>9</sup> a) A. D. Becke, *J. Chem. Phys.* 1993, **98**, 5648–5652.; b) C. Lee, W. Yang, R. G. Parr, *Phys. Rev. B* 1988, **37**, 785–789.
- <sup>10</sup> A) M. Katari, E. Nicol, V. Steinmetz, G. van der Rest, D. Carmichael, G. Frison, *Chem. Eur. J.* 2017, **23**, 8414–8423; b) E. Andris, R. Navrátil, J. Jašík, T. Terencio, M. Srnec, M. Costas, J. Roithová, *J. Am. Chem. Soc.* 2017, **139**, 2757–2765 and references herein.
- <sup>11</sup> A. Schaefer, C. Huber, and R. Ahlrichs, *J. Chem. Phys.*, 1994, **100**, 5829-35
- <sup>12</sup> F. Weigend and R. Ahlrichs, *Phys. Chem. Chem. Phys.*, 2005, **7**, 3297-305
